# Supplementary material for: Comparison of the Electromyography Activity during Exercises with Stable and Unstable Surfaces: A Systematic Review and Meta-Analysis
Source: MDPI journal article supplement (doi:10.3390/sports12040111), 2024-04-18
Supplement: s1 [file s1]

**Title:** Comparison of the electromyography activity during exercises with stable and unstable surfaces: A systematic review and meta-analysis

**Supplementary Online Material S5 - Sensitivity Analysis**

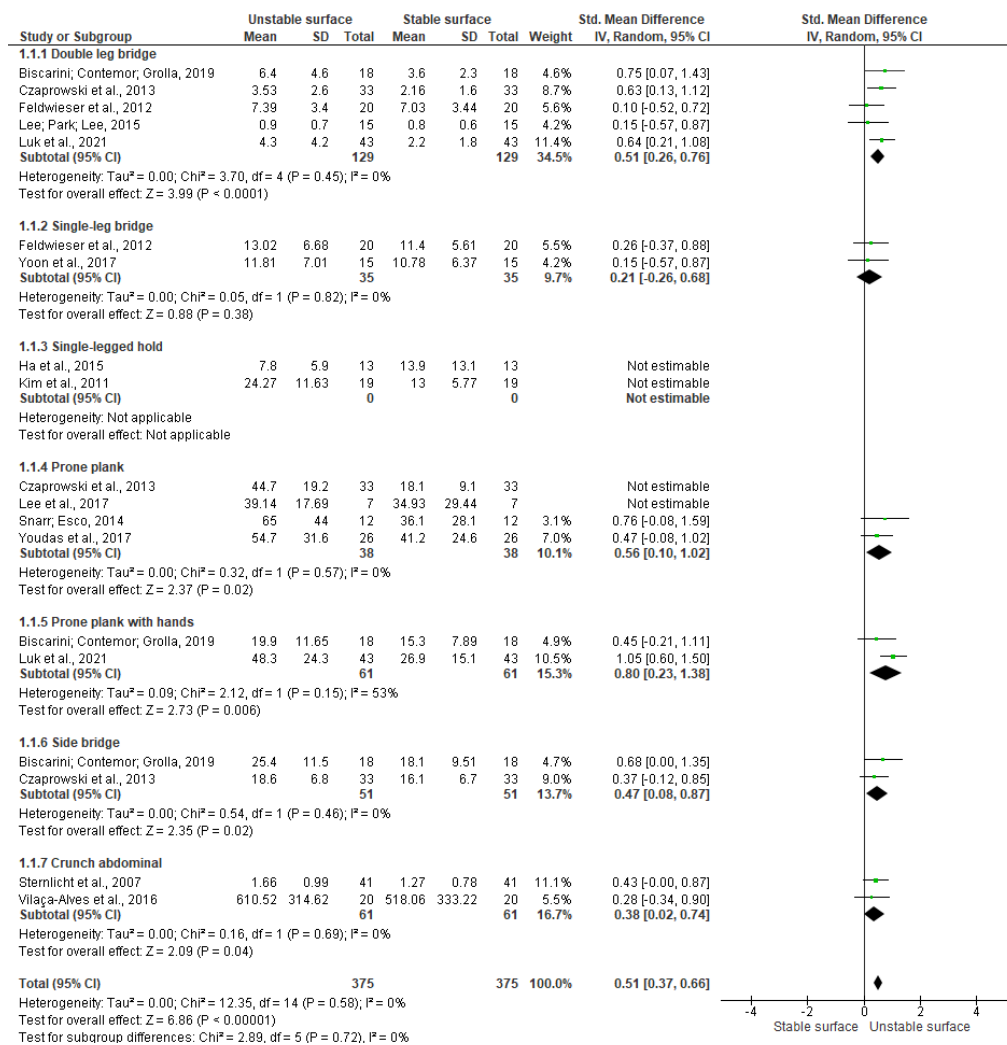

**Figure 1.** Forest plot of the rectus abdominis muscle EMG activity on an unstable surface versus a stable surface.

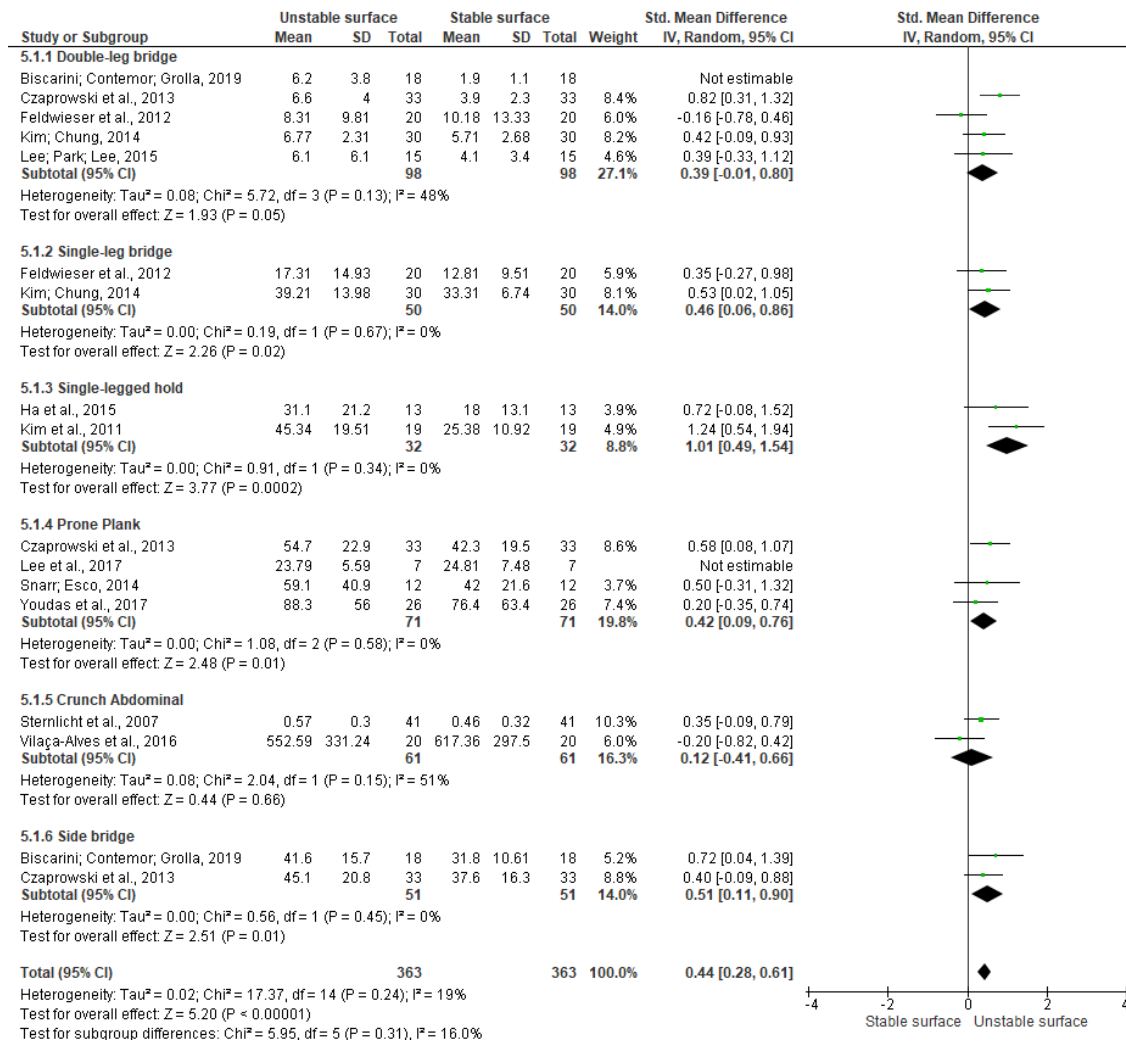

**Figure 2.** Forest plot of the external oblique muscle EMG activity on an unstable surface versus a stable surface.

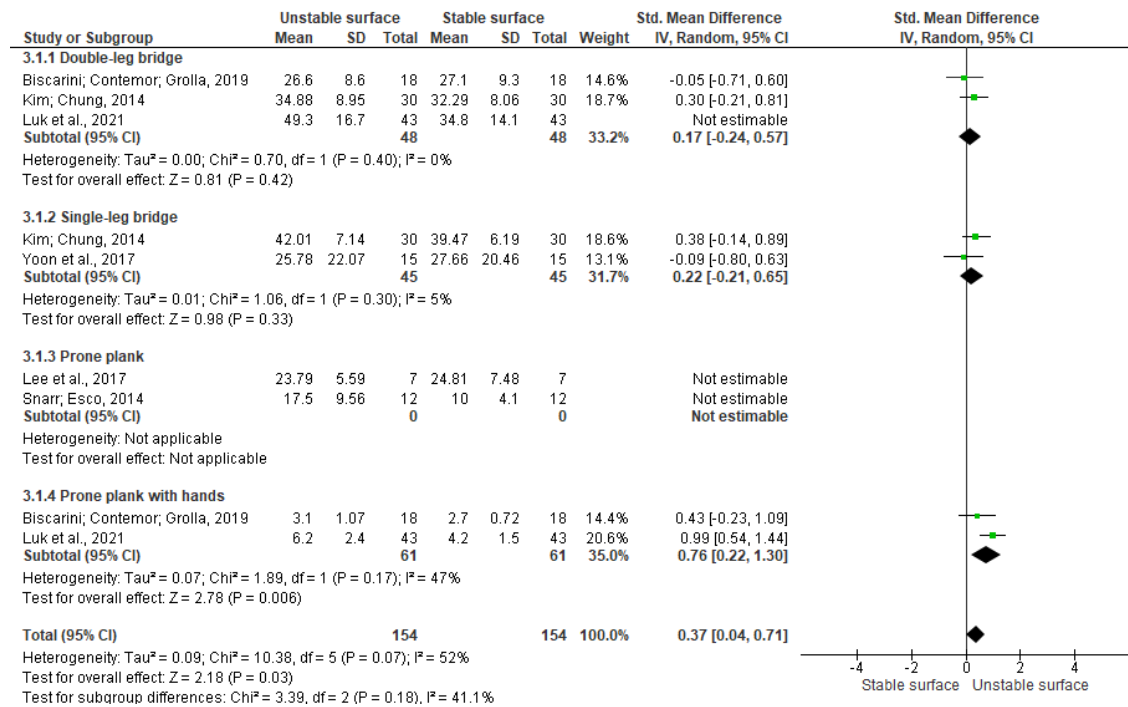

**Figure 3.** Forest plot of the erector spinae muscle EMG activity on an unstable surface versus a stable surface.

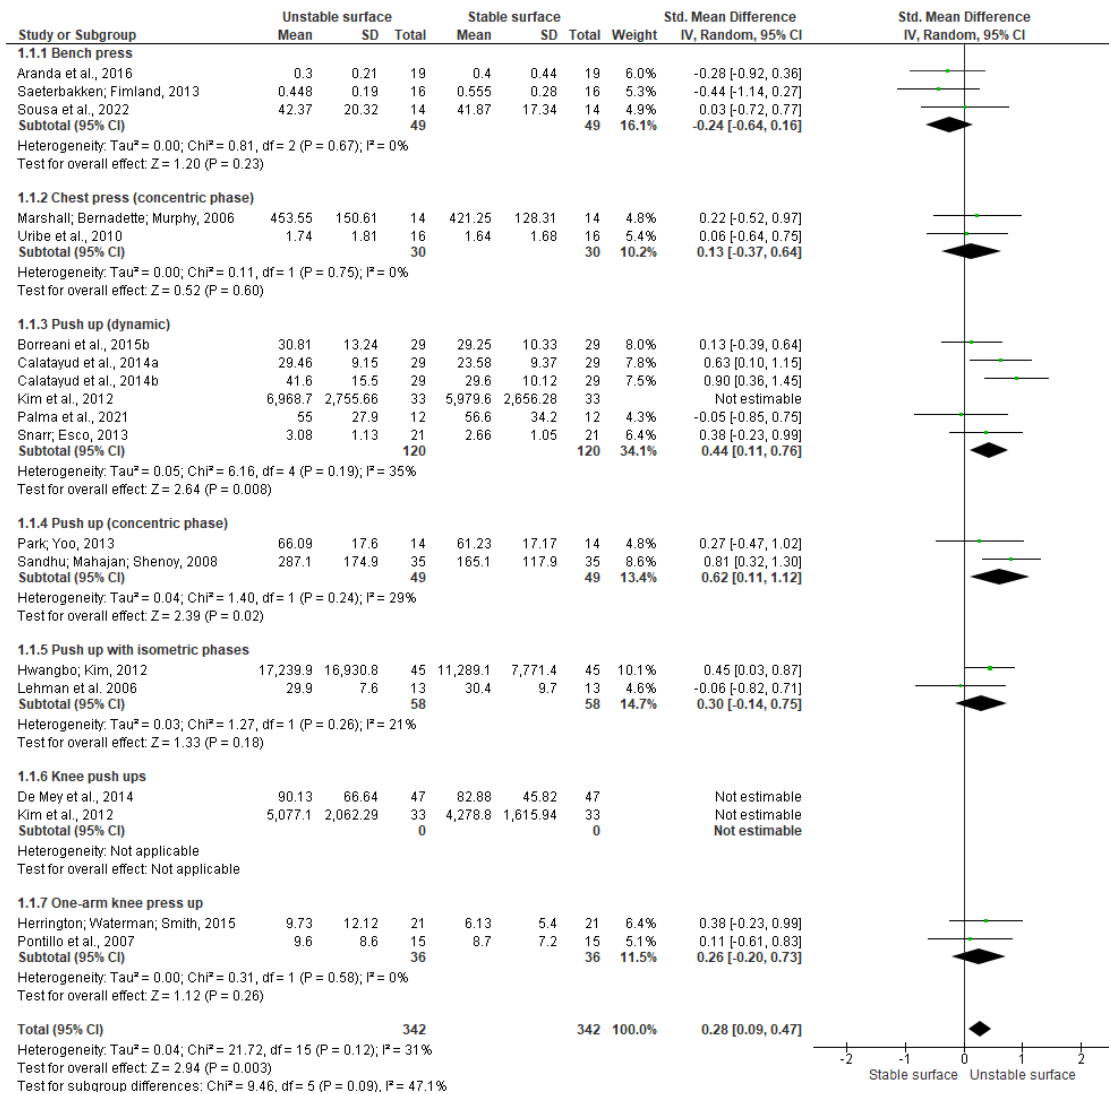

**Figure 4.** Forest plot of the pectoralis major muscle EMG activity on an unstable surface versus a stable surface.

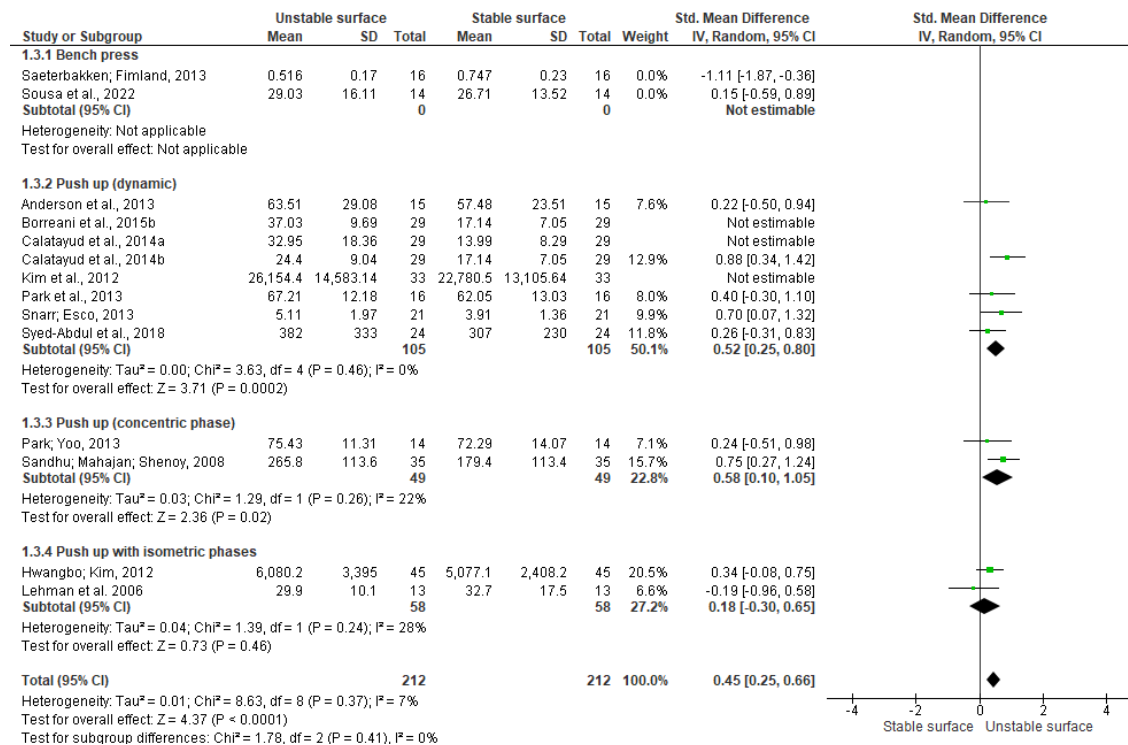

**Figure 5.** Forest plot of the triceps muscle EMG activity on an unstable surface versus a stable surface.

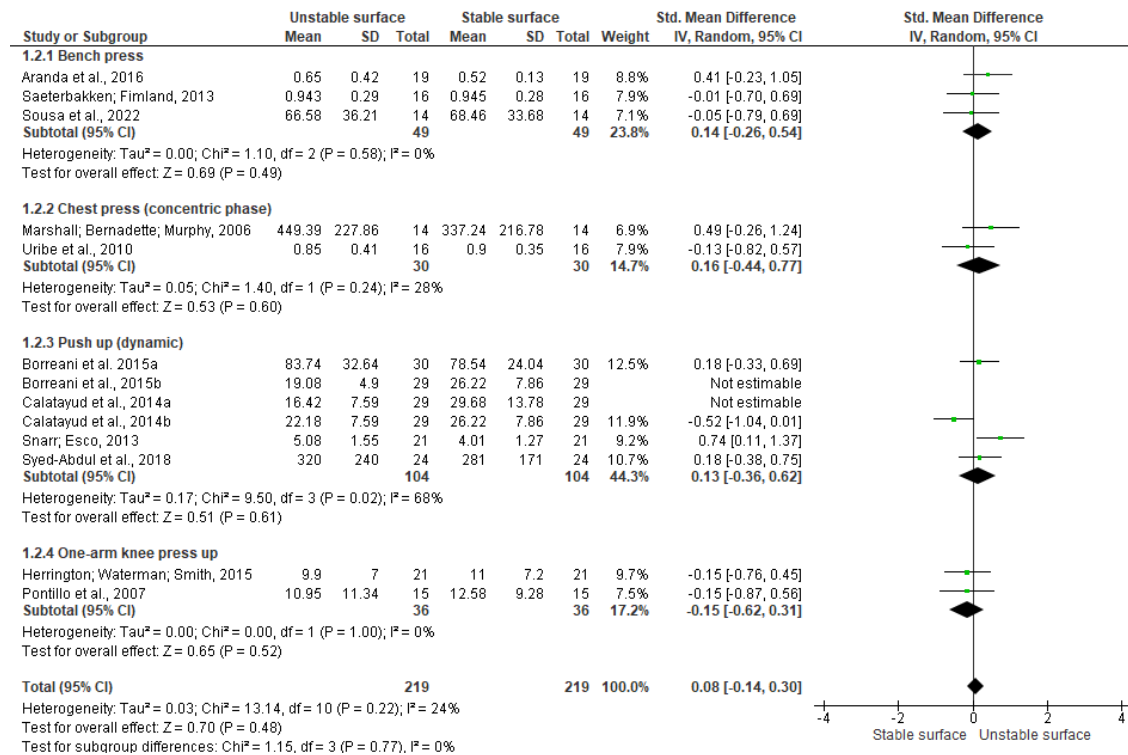

**Figure 6.** Forest plot of the anterior deltoid muscle EMG activity on an unstable surface versus a stable surface.

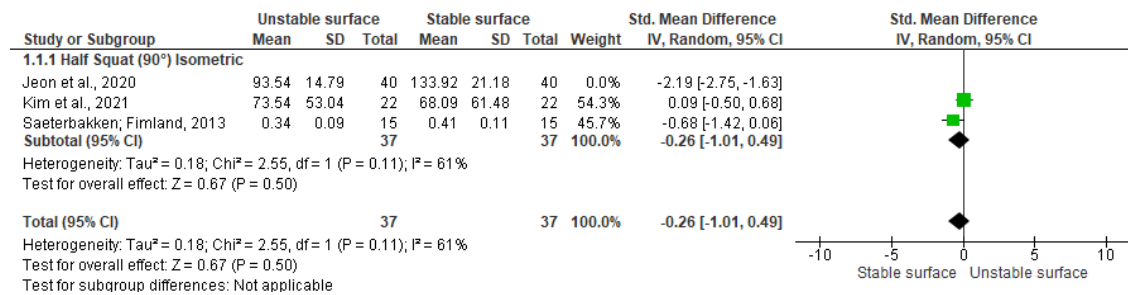

**Figure 7.** Forest plot of the rectus femoris muscle EMG activity on an unstable surface versus a stable surface.

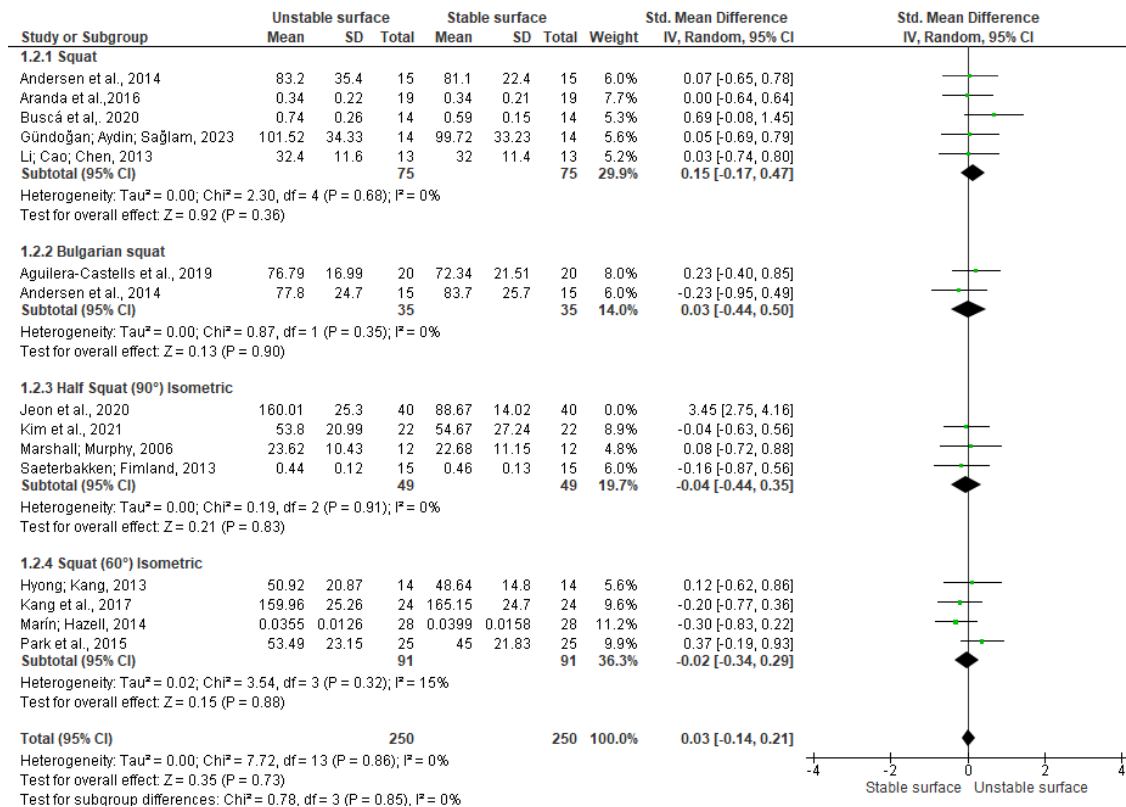

**Figure 8.** Forest plot of the vastus lateralis muscle EMG activity on an unstable surface versus a stable surface.

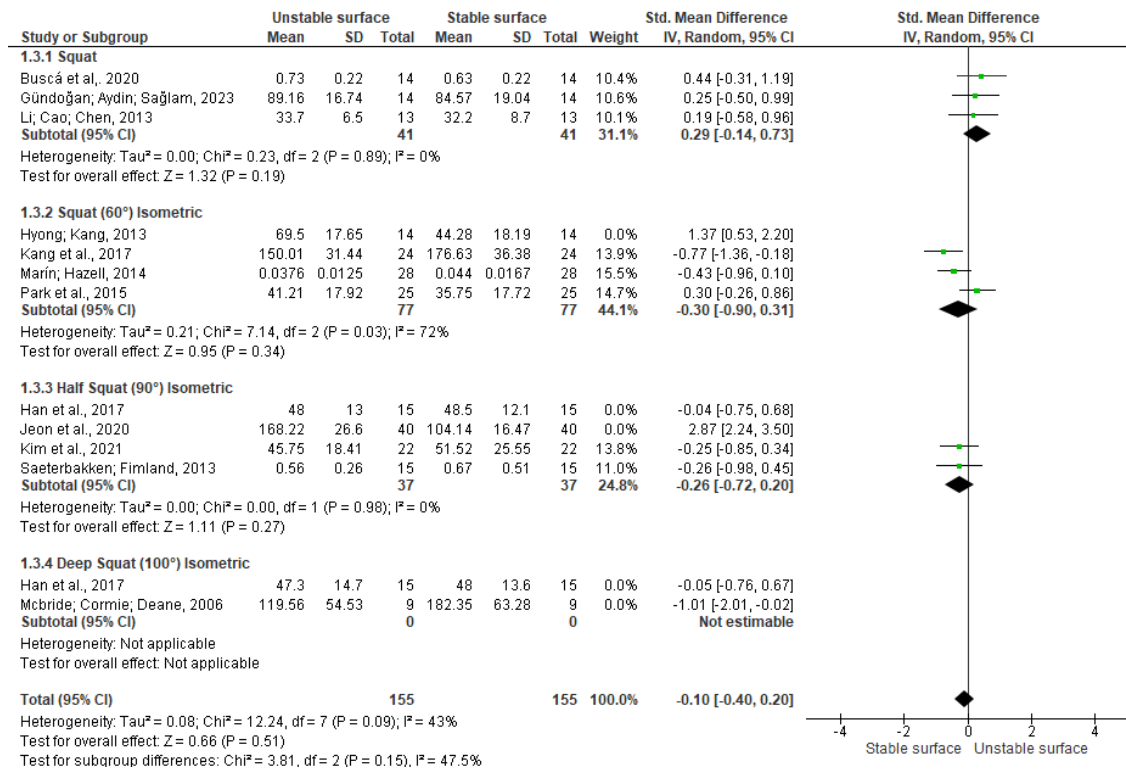

**Figure 9.** Forest plot of the vastus medialis muscle EMG activity on an unstable surface versus a stable surface.

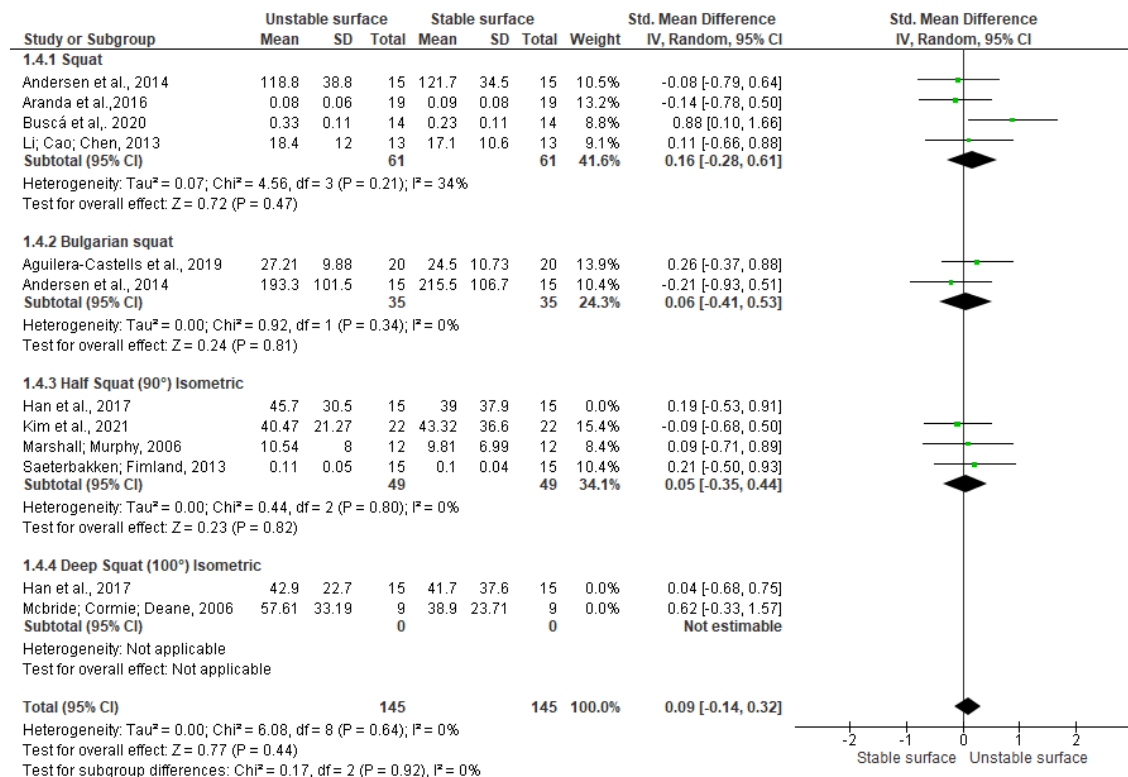

**Figure 10.** Forest plot of the biceps femoris muscle EMG activity on an unstable surface versus a stable surface.
