# Supplementary material for: Comparison of the Electromyography Activity during Exercises with Stable and Unstable Surfaces: A Systematic Review and Meta-Analysis
Source: MDPI journal article supplement (doi:10.3390/sports12040111), 2024-04-18
Supplement: s1 [file s1]

**Title:** Comparison of the electromyography activity during exercises with stable and unstable surfaces: A systematic review and meta-analysis

**Supplementary Online Material S4**

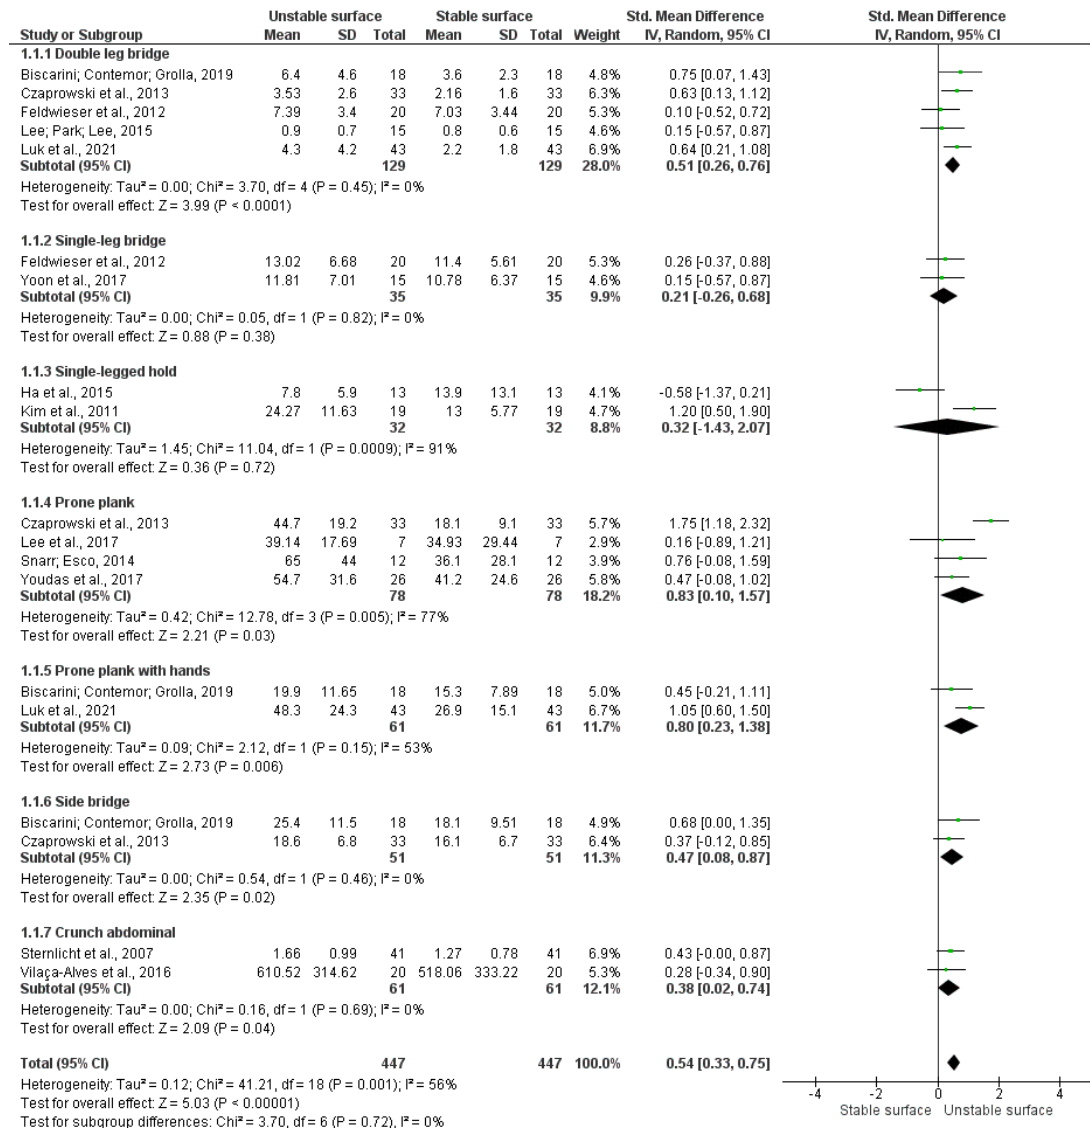

**Figure 1.** Forest plot of the rectus abdominis muscle EMG activity on an unstable surface versus a stable surface.

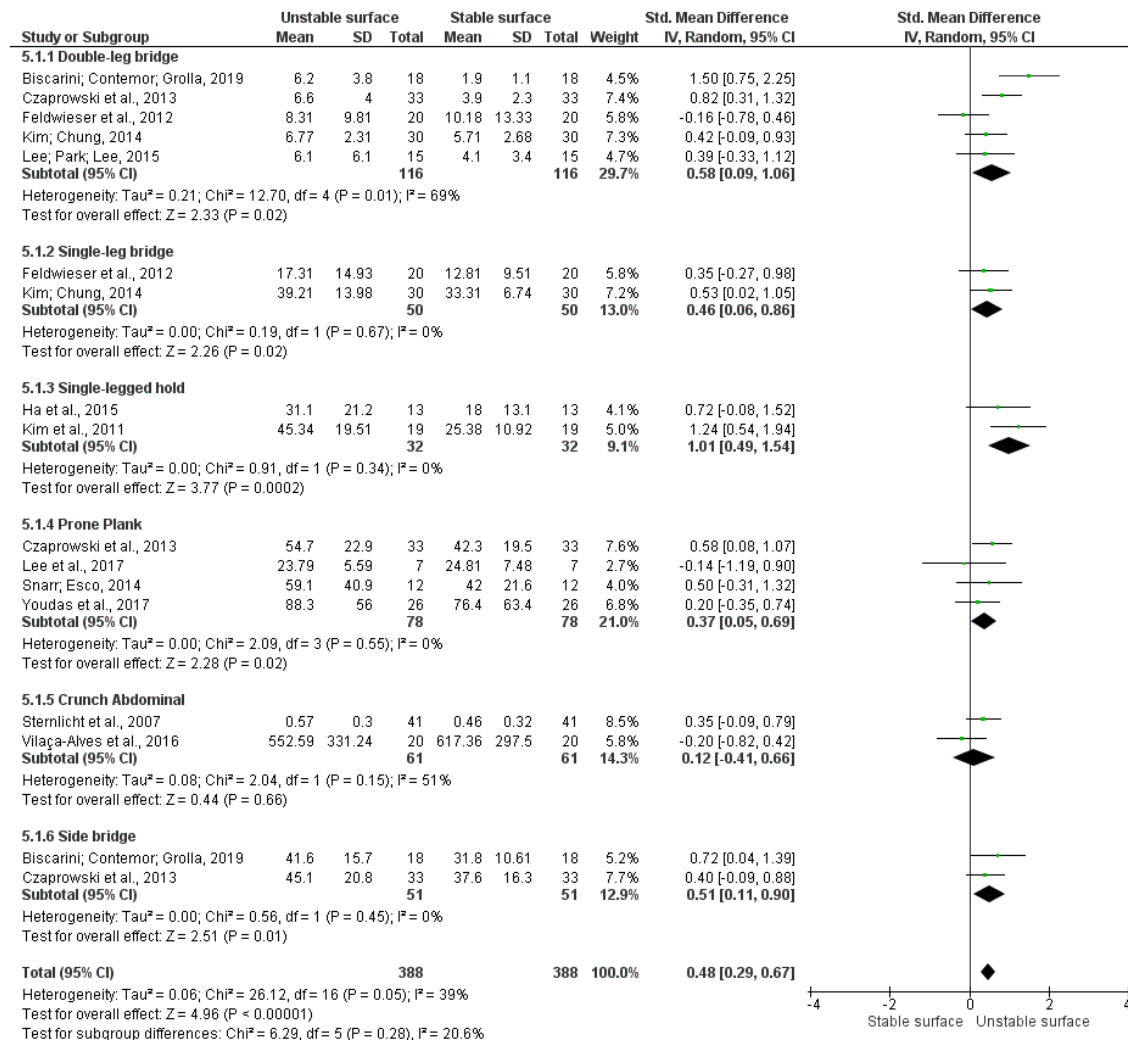

**Figure 2.** Forest plot of the external oblique muscle EMG activity on an unstable surface versus a stable surface.

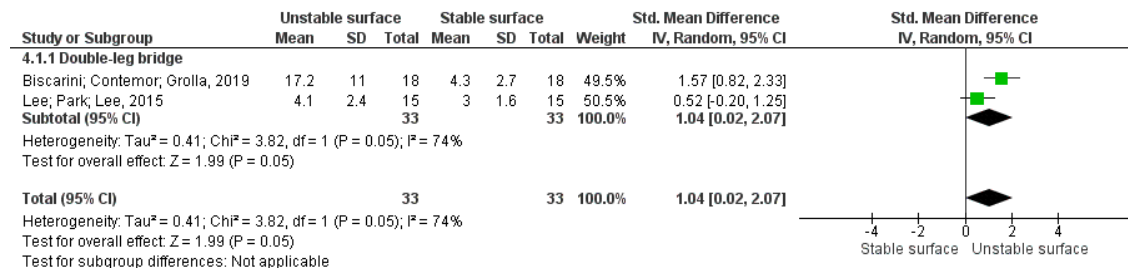

**Figure 3.** Forest plot of the internal oblique muscle EMG activity on an unstable surface versus a stable surface.

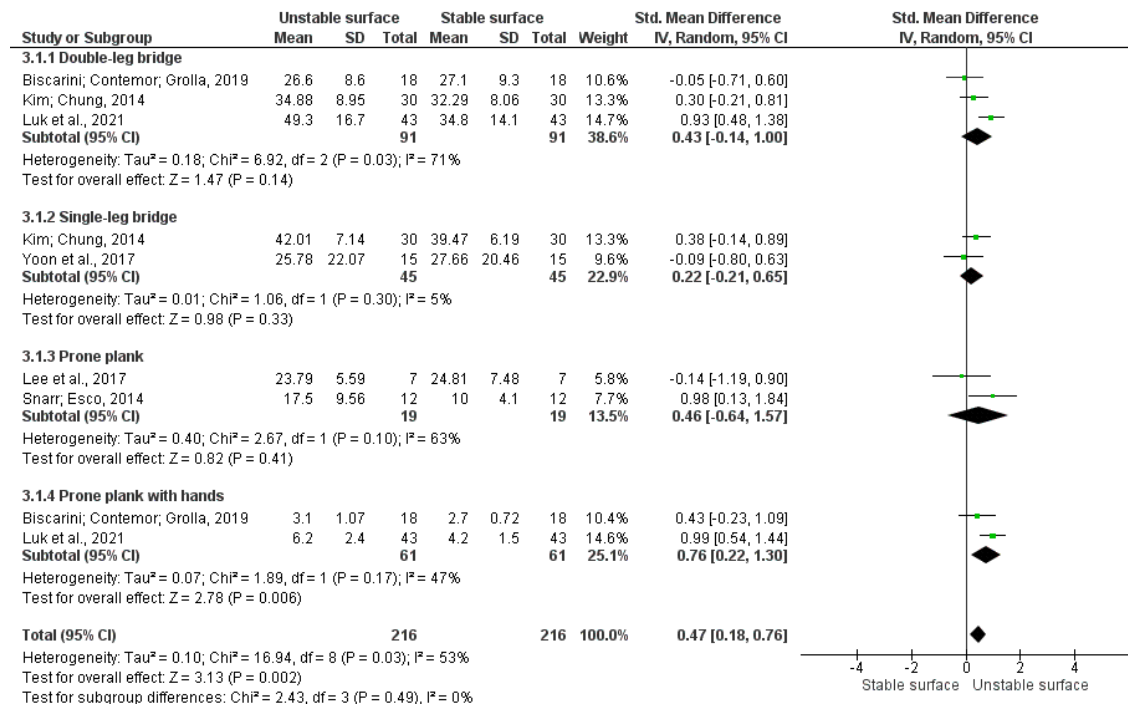

**Figure 4.** Forest plot of the erector spinae muscle EMG activity on an unstable surface versus a stable surface.

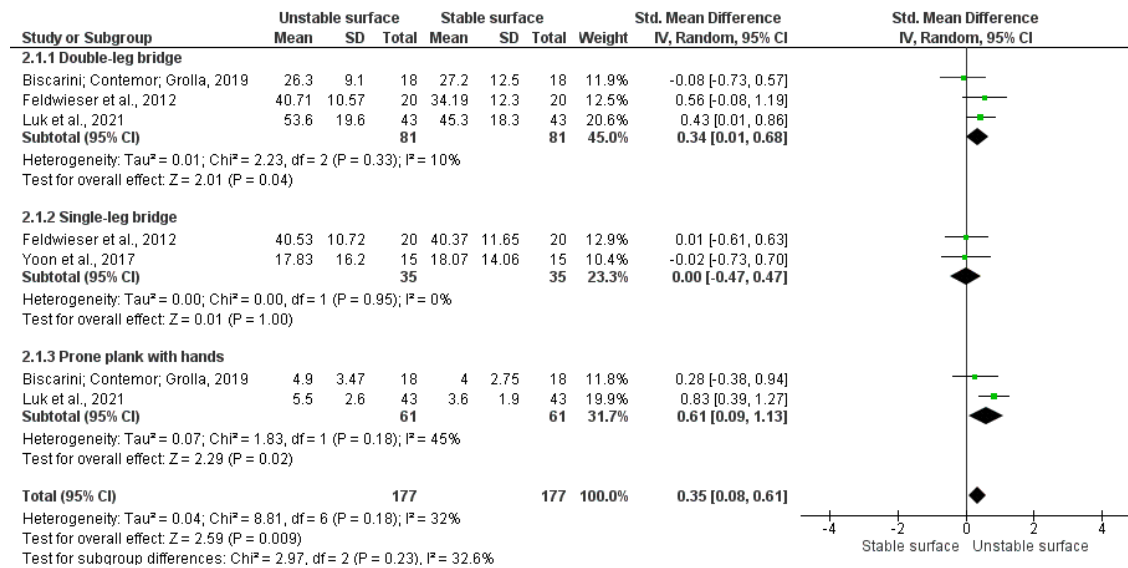

**Figure 5.** Forest plot of the lumbar multifidus muscle EMG activity on an unstable surface versus a stable surface.

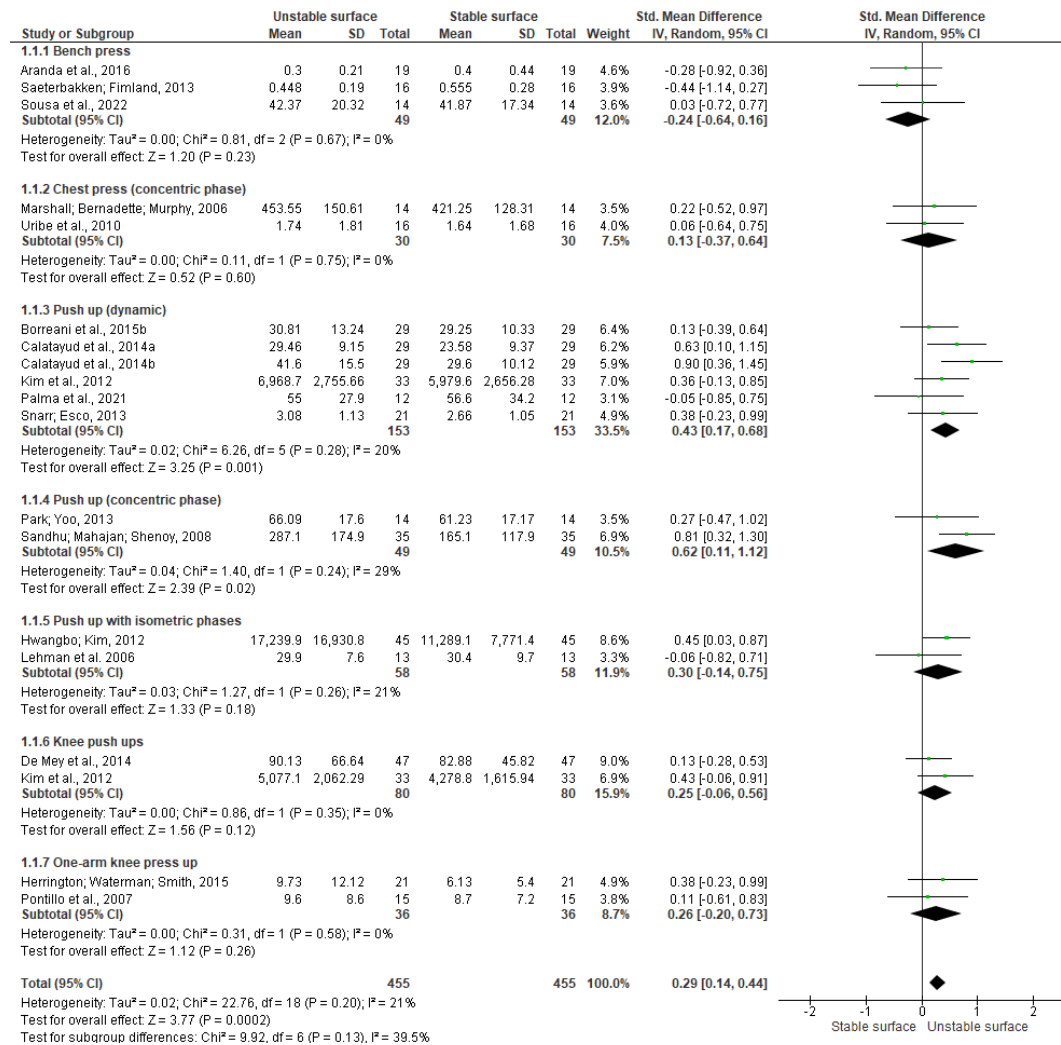

**Figure 6.** Forest plot of the pectoralis major muscle EMG activity on an unstable surface versus a stable surface.

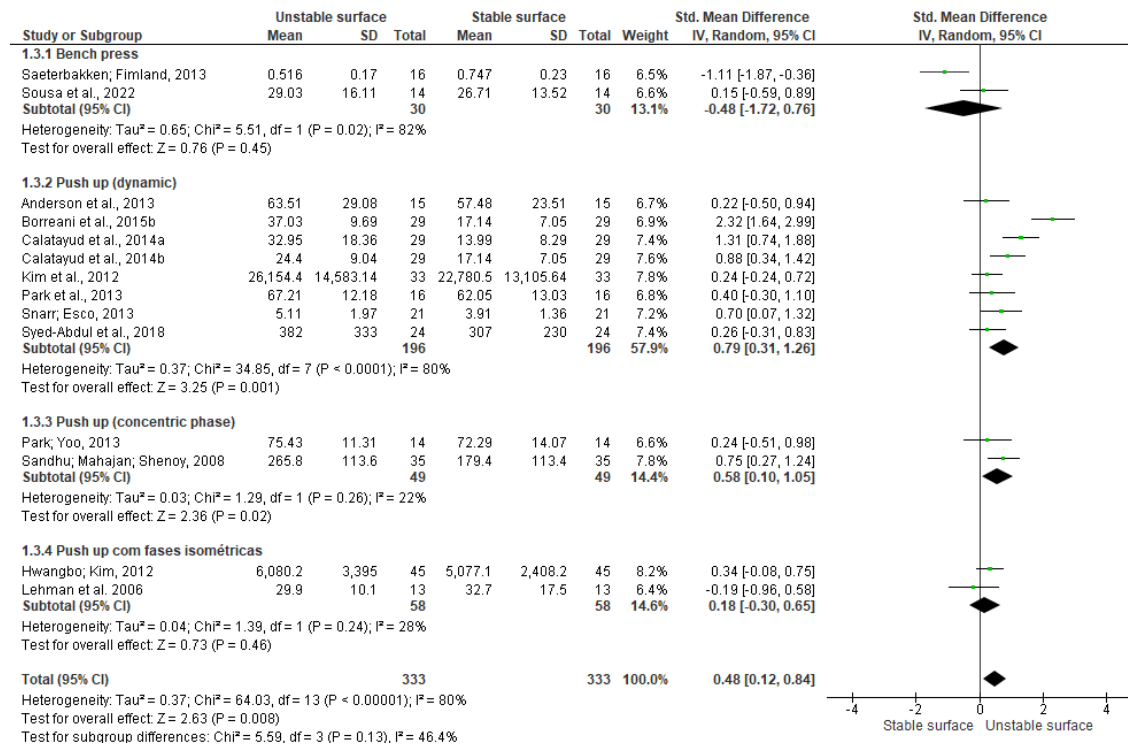

**Figure 7.** Forest plot of the triceps muscle EMG activity on an unstable surface versus a stable surface.



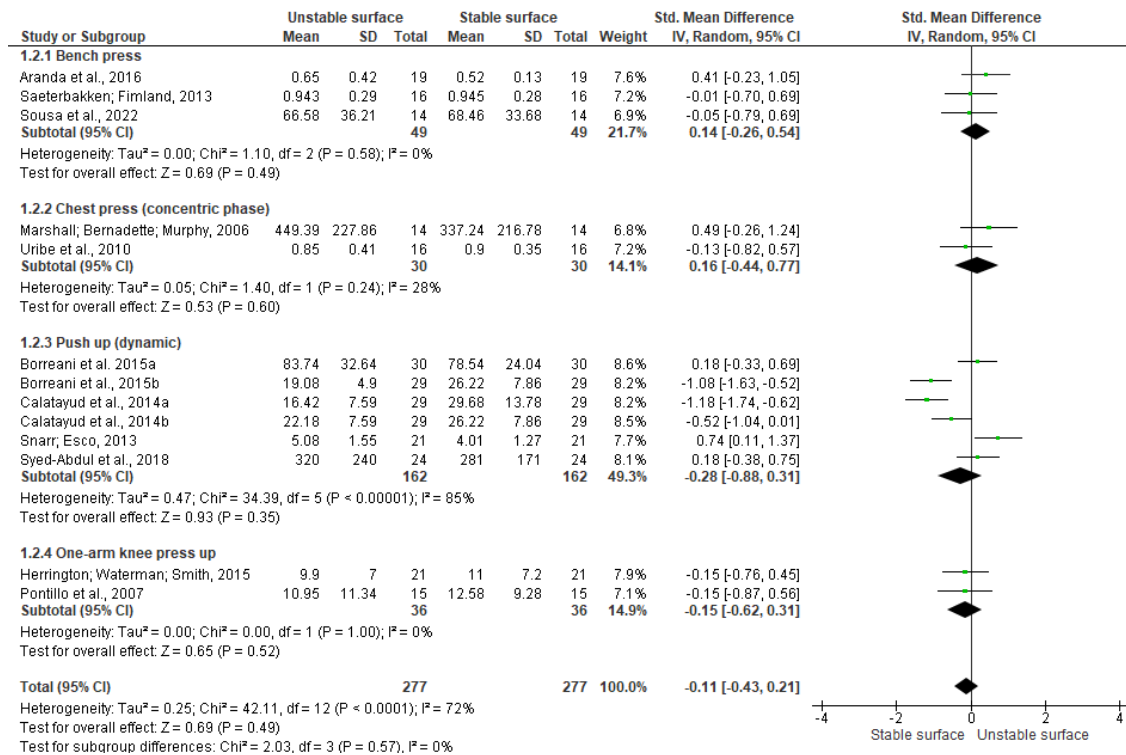

**Figure 8.** Forest plot of the anterior deltoid muscle EMG activity on an unstable surface versus a stable surface.

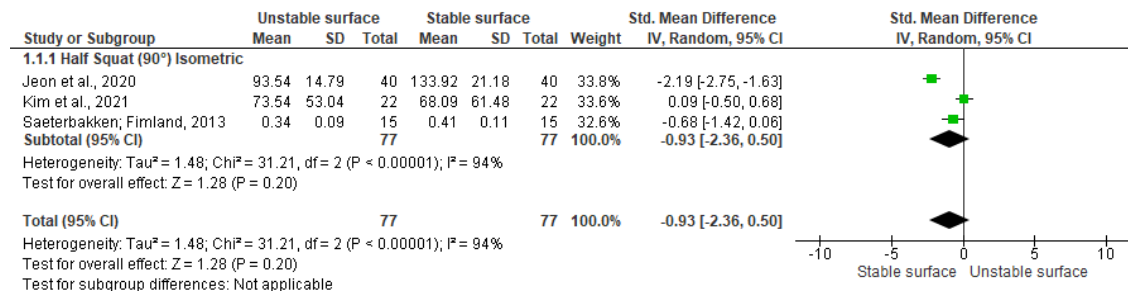

**Figure 9.** Forest plot of the rectus femoris muscle EMG activity on an unstable surface versus a stable surface.

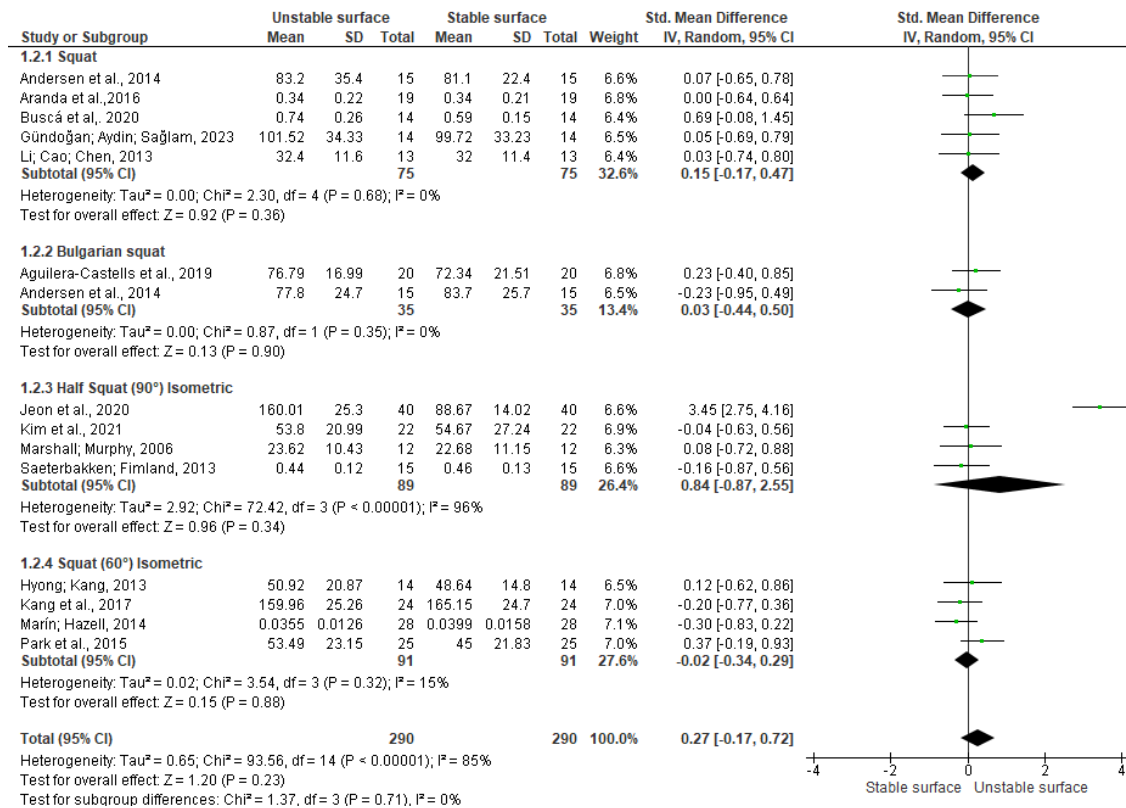

**Figure 10.** Forest plot of the vastus lateralis muscle EMG activity on an unstable surface versus a stable surface.

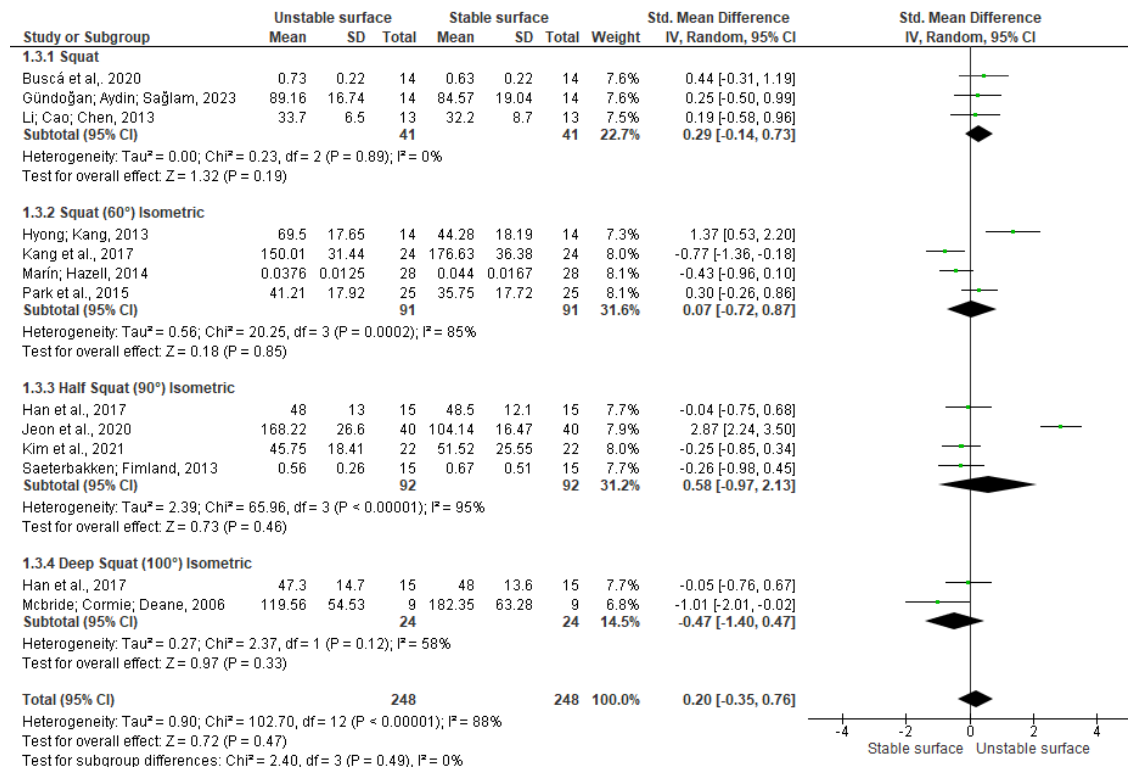

**Figure 11.** Forest plot of the vastus medialis muscle EMG activity on an unstable surface versus a stable surface.

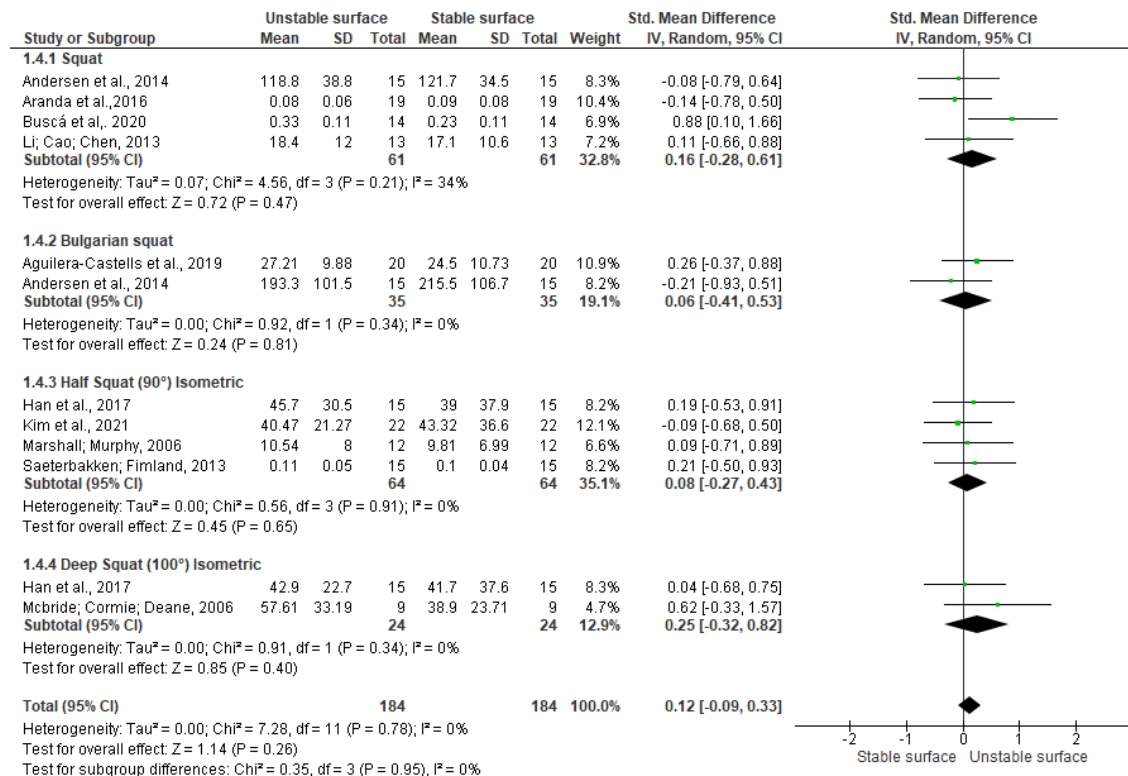

**Figure 12.** Forest plot of the biceps femoris muscle EMG activity on an unstable surface versus a stable surface.

**Table 1.** Intensity of exercises included in the meta-analysis.

| <b>EXERCISE</b>    | <b>STUDY</b>                  | <b>INTENSITY</b> |
|--------------------|-------------------------------|------------------|
| <b>BENCH PRESS</b> | ARANDA et al., 2016           | 15 RMs           |
|                    | SOUSA et al., 2022            | 50% of 1 RM      |
|                    | SAETERBAKKEN; FIMLAND, 2013   | 50% of 6 RM      |
| <b>CHEST PRESS</b> | MARSHALL; MURPHY, 2006        | 60% of 1 RM.     |
|                    | URIBE et al., 2010            | 80% of 1 RM.     |
| <b>SQUAT</b>       | ANDERSEN et al., 2014         | 6 RMs            |
|                    | ARANDA et al., 2016           | 15 RMs           |
|                    | BUSCÀ et al., 2020            | 80% of 1 RM      |
|                    | LI; CAO; CHEN, 2013           | 60% of 1 RM      |
|                    | GÜNDOĞAN; AYDIN; SAĞLAM, 2023 | Body weight      |
