# Supplementary material for: Comparison of the Electromyography Activity during Exercises with Stable and Unstable Surfaces: A Systematic Review and Meta-Analysis
Source: MDPI journal article supplement (doi:10.3390/sports12040111), 2024-04-18
Supplement: s1 [file s1]

**Title:** Comparison of the electromyography activity during exercises with stable and unstable surfaces: A systematic review and meta-analysis

### **Supplementary Online Material S1**

- 1. Electronic searches:** A systematic review of the literature was conducted on six electronic databases for studies published until March 2023 (Pubmed, Web of Science, Scopus, Cochrane Library, Scielo and Lilacs).
- 2. PICOS Strategy:** 1) Population: athletes and non-athletic adults from both sexes who were experienced with exercises using instability devices; (2) Interventions: exercises for the upper, lower limbs or trunk/core using an unstable surface; (3) Comparators: the same exercises performed on a stable base; (4) Outcomes: EMG amplitude values of the agonist muscles; (5) Study type: cross-sectional studies that compared electromyographic activity during an exercise with and without unstable surfaces.

| <b>Data base</b>        | <b>Expressions</b>                                                                                                                                                                                                                                                                                                                                                                                                                                                                                                                                                                                                                                                                                                                                                                                                                                            | <b>Results</b> |
|-------------------------|---------------------------------------------------------------------------------------------------------------------------------------------------------------------------------------------------------------------------------------------------------------------------------------------------------------------------------------------------------------------------------------------------------------------------------------------------------------------------------------------------------------------------------------------------------------------------------------------------------------------------------------------------------------------------------------------------------------------------------------------------------------------------------------------------------------------------------------------------------------|----------------|
| <b>PUBMED</b>           | ((((((((((("instability resistance training") OR ("instability strength training")) OR ("free-weight training")) OR ("instability weight-bearing exercise program")) OR ("instability weight-bearing strengthening program")) OR ("instability weight-lifting exercise program")) OR ("weight-lifting strengthening program")) OR (unstable)) OR (instability)) OR ("unstable training")) OR ("unstable surface")) AND (((((((Electromyography) OR (Electromyographies)) OR (Electromyographic)) OR ("Surface Electromyography")) OR (EMG)) OR ("Muscle activity")) OR ("Muscle activation"))                                                                                                                                                                                                                                                                 | 3676           |
| <b>Cochrane Library</b> | Electromyography OR Electromyographies OR Electromyographic OR "Surface Electromyography" OR EMG OR "Muscle activity" OR "Muscle activation" in Title Abstract Keyword AND "instability resistance training" OR "instability strength training" OR "free-weight training" OR "instability weight-bearing exercise program" OR "instability weight-bearing strengthening program" OR "instability weight-lifting exercise program" OR "weight-lifting strengthening program" OR unstable OR instability OR "unstable training" OR "unstable surface" in Title Abstract Keyword - (Word variations have been searched)                                                                                                                                                                                                                                          | 346            |
| <b>Scielo</b>           | ("instability resistance training") OR ("instability strength training") OR ("free-weight training") OR ("instability weight-bearing exercise program") OR ("instability weight-bearing strengthening program") OR ("instability weight-lifting exercise program") OR ("weight-lifting strengthening program") OR (unstable) OR (instability) OR ("unstable training") OR ("unstable surface") AND (Electromyography) OR (Electromyographies) OR (Electromyographic) OR ("Surface Electromyography") OR (EMG) OR ("Muscle activity") OR ("Muscle activation")                                                                                                                                                                                                                                                                                                 | 7              |
| <b>Scopus</b>           | TITLE-ABS-KEY ( electromyography ) OR TITLE-ABS-KEY ( electromyographies ) OR TITLE-ABS-KEY ( electromyographic ) OR TITLE-ABS-KEY ( "Surface Electromyography" ) OR TITLE-ABS-KEY ( EMG ) OR TITLE-ABS-KEY ( "Muscle activity" ) OR TITLE-ABS-KEY ( "Muscle activation" ) AND TITLE-ABS-KEY ( unstable ) OR TITLE-ABS-KEY ( instability ) OR TITLE-ABS-KEY ( "instability resistance training" ) OR TITLE-ABS-KEY ( "instability strength training" ) OR TITLE-ABS-KEY ( "free-weight training" ) OR TITLE-ABS-KEY ( "instability weight-bearing exercise program" ) OR TITLE-ABS-KEY ( "instability weight-bearing strengthening program" ) OR TITLE-ABS-KEY ( "instability weight-lifting exercise program" ) OR TITLE-ABS-KEY ( "weight-lifting strengthening program" ) OR TITLE-ABS-KEY ( "unstable training" ) OR TITLE-ABS-KEY ( "unstable surface" ) | 2985           |
| <b>Web of Science</b>   | (ALL=("instability resistance training" OR "instability strength training" OR "free-weight training" OR "instability weight-bearing exercise program" OR "instability weight-bearing strengthening program" OR "instability weight-lifting exercise program" OR "weight-lifting strengthening program" OR unstable OR instability OR "unstable training" OR "unstable surface")) AND ALL=(Electromyography OR electromyographies OR Electromyographic OR "Surface Electromyography" OR EMG OR "Muscle activity" OR "Muscle activation")                                                                                                                                                                                                                                                                                                                       | 2493           |
| <b>LILACS</b>           | (tw:("instability resistance training")) OR (tw:("instability strength training")) OR (tw:("free-weight training")) OR (tw:("instability weight-bearing exercise program")) OR (tw:("instability weight-bearing strengthening program")) OR (tw:("instability weight-lifting exercise program")) OR (tw:("weight-lifting strengthening program")) OR (tw:(unstable)) OR (tw:(instability)) OR (tw:("unstable training")) OR (tw:("unstable surface")) AND (tw:(Electromyography)) OR (tw:(Electromyographies)) OR (tw:(Electromyographic)) OR (tw:("Surface Electromyography")) OR (tw:(EMG)) OR (tw:("Muscle activity")) OR (tw:("Muscle activation"))                                                                                                                                                                                                       | 19             |
| <b>Total articles</b>   |                                                                                                                                                                                                                                                                                                                                                                                                                                                                                                                                                                                                                                                                                                                                                                                                                                                               | <b>9526</b>    |

**Table 1.** Summary of the characteristics and results of the selected studies to core muscles.

| Authors                        | Sample                                            | Muscles                                                                          | Exercise                                                                                                      | Unstable surface          | Stable surface          | Main Results                                                                                                                                                                                                                                                 |
|--------------------------------|---------------------------------------------------|----------------------------------------------------------------------------------|---------------------------------------------------------------------------------------------------------------|---------------------------|-------------------------|--------------------------------------------------------------------------------------------------------------------------------------------------------------------------------------------------------------------------------------------------------------|
| (BEHM et al., 2005)            | n = 6 males; 5 females<br>24.1 ± 7.4 years old    | Upper lumbar,<br>lumbosacral erector<br>spinae,<br>lower-abdominal.              | Bridge,<br>pelvic tilt,<br>alternate arm and leg<br>extension,<br>parallel hold,<br>side bridge,<br>superman. | Swiss ball.               | Bench.                  | ↑ Unstable surface (lower-abdominal)<br>↔ EMG activity (upper lumbar, lumbosacral erector<br>spinae)                                                                                                                                                         |
| (MARSHALL;<br>MURPHY, 2006a)   | n = 8 males; 4 females<br>22.1 ± 2.4 years old    | Rectus abdominis,<br>external oblique.                                           | Double leg hold.                                                                                              | Swiss ball.               | Stable surface.         | ↑ Unstable surface (rectus abdominis)<br>↔ EMG activity (external oblique)                                                                                                                                                                                   |
| (YOUDAS et al., 2015)          | n = 13 males; 13 females<br>23.4 ± 1.2 years old  | Lumbar multifidus                                                                | Double-leg bridge,<br>single-leg bridge,<br>Double-leg bridge with<br>hamstring curl.                         | Swiss ball,<br>Bosu ball. | Floor,<br>slider sheet. | ↔ EMG activity (lumbar multifidus)                                                                                                                                                                                                                           |
| (KIM; KIM; CHUNG,<br>2014)     | n = 30 females<br>37.13 ± 6.39 years old          | External oblique,<br>erector spinae.                                             | Double-leg bridge,<br>Single-leg bridge,<br>Single-leg cross<br>bridging.                                     | Air cushion.              | Floor.                  | ↑ Unstable surface (external oblique erector spinae)                                                                                                                                                                                                         |
| (YOON et al., 2018)            | n = 12 males; 3 females<br>27.47 ± 3.04 years old | Rectus abdominis,<br>internal oblique,<br>erector spinae,<br>multifidus.         | Single-leg bridge.                                                                                            | Dynamic air cushion.      | Stable surface.         | ↔ EMG activity (rectus abdominis, internal oblique,<br>erector spinae, multifidus)                                                                                                                                                                           |
| (ANDRADE et al.,<br>2015)      | n = 19 females<br>25.6 ± 5 years old              | Rectus abdominis,<br>lumbar multifidus.                                          | Crunch exercise.                                                                                              | Foam roller.              | Floor.                  | ↔ EMG activity (rectus abdominis)<br>↑ Stable surface (lumbar multifidus)                                                                                                                                                                                    |
| (YOUDAS et al., 2017)          | n = 13 males; 13 females<br>25.2 ± 4.7 years old  | Lumbar multifidi,<br>rectus abdominis,<br>external oblique,<br>internal oblique. | Prone plank.                                                                                                  | Swiss ball.               | Floor.                  | ↔ EMG activity (lumbar multifidi, internal oblique, rectus<br>abdominis, external oblique)                                                                                                                                                                   |
| (VILAÇA-ALVES et al.,<br>2016) | n = 20 males<br>22.4 ± 2.4 years old              | Rectus abdominal,<br>external oblique.                                           | Crunch exercise.                                                                                              | Swiss ball.               | Floor.                  | ↔ EMG activity (rectus abdominal, external oblique)                                                                                                                                                                                                          |
| (STERNLICHT et al.,<br>2007)   | n = 23 males; 18 females<br>20.3 ± 1.5 years old  | Upper Rectus abdominis,<br>lower rectus abdominis,<br>external oblique.          | Abdominal crunch.                                                                                             | Swiss ball.               | Floor.                  | ↓ Unstable surface when supporting the Swiss ball in the<br>upper region (upper rectus abdominis, lower rectus<br>abdominis, external oblique). However, there was no<br>difference between the surfaces when the ball was placed<br>in the inferior region. |
| (LUK et al., 2021)             | N = 43 females<br>21.40 ± 1.78 years old          | Rectus abdominis,<br>lumbar multifidus,<br>erector spinae.                       | Double-leg bridge,<br>Prone plank.                                                                            | TRX.                      | Floor.                  | ↑ in activity of the<br>rectus abdominal, erector spinae, lumbar multifidus on<br>unstable surface ( <b>Suspension on feet</b> ) in comparison with<br>Supine-arm suspension and stable surface.                                                             |

**Table 1. (continued)**

|                             |                                                   |                                                                                      |                                                     |                                               |                 |                                                                                                                                                                                                                                                    |
|-----------------------------|---------------------------------------------------|--------------------------------------------------------------------------------------|-----------------------------------------------------|-----------------------------------------------|-----------------|----------------------------------------------------------------------------------------------------------------------------------------------------------------------------------------------------------------------------------------------------|
| (FELDWIESER et al., 2012)   | n = 4 males; 16 females<br>25.45 ± 3.57 years old | Lumbar multifidus,<br>rectus abdominis,<br>external oblique.                         | Double-leg bridge,<br>single-leg bridge.            | Ball cushion,<br>Swiss ball.                  | Floor.          | <p><b>Double-leg bridge</b><br/>↔ EMG activity (rectus abdominis, external oblique,<br/>lumbar multifidus)</p> <p><b>Single-leg bridge</b><br/>↔ EMG activity (lumbar multifidus, external oblique,<br/>rectus abdominis)</p>                      |
| (KIM; OH, 2015)             | n = 9 males; 5 females<br>20.6 ± 1.6 years old    | Rectus abdominis,<br>external oblique,<br>internal oblique,<br>transverse abdominis. | Curl-up.                                            | Swiss ball.                                   | Floor.          | <p>↔ EMG activity (rectus abdominis, external oblique,<br/>internal oblique)</p> <p>↑ Unstable surface (transverse abdominis)</p>                                                                                                                  |
| (SAETERBAKKEN et al., 2014) | n = 24 males<br>23 ± 2 years old                  | Rectus abdominis,<br>external oblique.                                               | Sit-ups with body weight<br>and elastic resistance. | Bosu ball.                                    | Stable surface. | <p><b>Sit-ups with body weight</b><br/>↔ EMG activity (rectus abdominis)<br/>↑ Stable surface (external oblique)</p> <p><b>Sit-ups with elastic resistance</b><br/>↑ Unstable surface (rectus abdominis)<br/>↔ EMG activity (external oblique)</p> |
| (SUNDSTRUP et al., 2012)    | n = 18 males; 24 females<br>42 ± 11 years old     | Rectus abdominis,<br>external oblique,<br>erector spinae.                            | Abdominal crunch.                                   | Swiss ball.                                   | Machine.        | <p>↑ Unstable surface (rectus abdominis)<br/>↔ EMG activity (external oblique, erector spinae)</p>                                                                                                                                                 |
| (LEHMAN et al., 2005)       | n = 7 males; 5 females<br>25.9 ± 5.5 years old    | Rectus abdominis,<br>external oblique, internal<br>oblique,<br>erector spinae.       | Curl up.                                            | Swiss ball.                                   | Flat bench.     | ↔ EMG activity (rectus abdominis, external oblique,<br>internal oblique, erector spinae)                                                                                                                                                           |
| (HA et al., 2015)           | n = 13 males<br>39.0 ± 6.5 years old              | Rectus abdominis,<br>external oblique,<br>internal oblique.                          | Single-leg hold.                                    | Foam-roll,<br>motorized rotating<br>platform. | Floor.          | <p>↑ Unstable surface (internal oblique) for foam-roll,<br/>↔ EMG activity (rectus abdominis, external oblique)</p>                                                                                                                                |
| (KIM et al., 2018)          | n = 28 males<br>26.43 ± 3.42 years old            | External oblique,<br>erector spinae.                                                 | Bridge.                                             | Swiss ball.                                   | Stable surface. | <p>↑ Unstable surface (external oblique)<br/>↔ EMG activity (erector spinae)</p>                                                                                                                                                                   |
| (ATKINS et al., 2015)       | n = 18 males<br>15.9 ± 2 years old                | Rectus abdominis,<br>external oblique,<br>erector spinae.                            | Prone plank.                                        | Swiss ball,<br>TRX.                           | Floor.          | <p>↑ Unstable surface—TRX (rectus abdominis)<br/>↑ Stable surface (external oblique)<br/>↔ EMG activity (erector spinae)</p>                                                                                                                       |
| (LEE; PARK; LEE, 2015)      | n = 15 males<br>22.2 ± 2.0 years old              | External oblique,<br>internal oblique,<br>rectus abdominis.                          | Double-leg bridge.                                  | Aero-step (Aero-step<br>XL, TOGU, Germany).   | Floor.          | ↑ Unstable surface (external oblique, internal oblique,<br>rectus abdominis) with angulation of 120°                                                                                                                                               |
| (BYRNE et al., 2014)        | n = 11 males; 10 females<br>21.9 ± 2.4 years old  | Rectus abdominis,<br>external oblique.                                               | Prone plank.                                        | TRX.                                          | Floor.          | ↑ Unstable surface (rectus abdominis,<br>external oblique)                                                                                                                                                                                         |
| (KIM et al., 2011)          | n = 11 males; 8 females<br>23.2 ± 2.3 years old   | Rectus abdominis,<br>external oblique.                                               | Single-legged hold.                                 | Round foam roll.                              | Floor.          | ↑ Unstable surface (all muscles)                                                                                                                                                                                                                   |

Table 1. (continued)

|                              |                                                  |                                                                                                          |                                                                      |                                            |                                         |                                                                                                                                                                                                                                                                                                                                                                                                                |
|------------------------------|--------------------------------------------------|----------------------------------------------------------------------------------------------------------|----------------------------------------------------------------------|--------------------------------------------|-----------------------------------------|----------------------------------------------------------------------------------------------------------------------------------------------------------------------------------------------------------------------------------------------------------------------------------------------------------------------------------------------------------------------------------------------------------------|
| (IMAI et al., 2010)          | n = 9 males<br>24.1 ± 0.8 years old              | External oblique,<br>erector spinae,<br>lumbar multifidus,<br>rectus abdominis,<br>transverse abdominis. | Elbow–toe,<br>back bridge,<br>Hand–knee,<br>side bridge,<br>Curl-up. | Bosu ball,<br>Swiss ball,<br>Balance disk. | Floor.                                  | <b>Elbow-toe</b><br>↑ Unstable surface (all muscles)                                                                                                                                                                                                                                                                                                                                                           |
|                              |                                                  |                                                                                                          |                                                                      |                                            |                                         | <b>Back bridge</b><br>↔ EMG activity (all muscles)                                                                                                                                                                                                                                                                                                                                                             |
|                              |                                                  |                                                                                                          |                                                                      |                                            |                                         | <b>Hand-knee</b><br>↑ Unstable surface (rectus abdominis, external oblique,<br>erector spinae).<br>↔ EMG activity (transverse abdominis, lumbar multifidus)                                                                                                                                                                                                                                                    |
|                              |                                                  |                                                                                                          |                                                                      |                                            |                                         | <b>Side bridge</b><br>↑ Unstable surface (rectus abdominis)<br>↔ EMG activity (external oblique, transverse abdominis,<br>erector spinae, lumbar multifidus)                                                                                                                                                                                                                                                   |
|                              |                                                  |                                                                                                          |                                                                      |                                            |                                         | <b>Curl-up</b><br>↑ Unstable surface (external oblique)<br>↑ Stable surface (transverse abdominis)<br>↔ EMG activity (rectus abdominis, erector spinae, lumbar<br>multifidus)                                                                                                                                                                                                                                  |
| (SNARR; ESCO, 2014)          | n= 6 males; 6 females<br>23.25 ± 2.95 years old  | Rectus abdominis,<br>external oblique,<br>lumbosacral erector<br>spinae.                                 | Prone plank.                                                         | Swiss ball,<br>TRX.                        | Floor.                                  | ↑ Unstable surface (all muscles), but in different exercises<br>↑ EMG activity was verified for the <b>elbows in suspension<br/>device plank</b> (rectus abdominis, external oblique and<br>lumbosacral erector spinae), but no difference was found<br>for the <b>feet on ball plank</b> (external oblique and<br>lumbosacral erector spinae) and <b>elbows on ball plank</b><br>(lumbosacral erector spinae) |
| (CZAPROWSKI et al.,<br>2014) | n = 15 males; 18 females<br>23.2 ± 2.5 years old | Rectus abdominis,<br>external oblique.                                                                   | Prone plank,                                                         | Bosu ball,<br>Swiss ball.                  | Stable surface<br>(Thera-Band, Canada). | <b>Prone plank</b><br>↑ Unstable surface (Swiss ball) of the rectus abdominis,<br>external oblique                                                                                                                                                                                                                                                                                                             |
|                              |                                                  |                                                                                                          | side bridge,                                                         |                                            |                                         | <b>Side bridge</b><br>↑ Unstable surface (Swiss ball) of the rectus abdominis,<br>external oblique                                                                                                                                                                                                                                                                                                             |
|                              |                                                  |                                                                                                          | double-leg bridge.                                                   |                                            |                                         | <b>Double-leg bridge</b><br>↑ Unstable surface (Swiss ball) of the rectus abdominis,<br>external oblique                                                                                                                                                                                                                                                                                                       |

**Table 1. (continued)**

|                                            |                                                                  |                                                                                               |                                            |                  |                 |                                                                                                                                                                                     |
|--------------------------------------------|------------------------------------------------------------------|-----------------------------------------------------------------------------------------------|--------------------------------------------|------------------|-----------------|-------------------------------------------------------------------------------------------------------------------------------------------------------------------------------------|
| (BISCARINI;<br>CONTEMORI;<br>GROLLA, 2019) | n = 11 males; 7 females<br>29 years old<br>Range 21-52 years old | Rectus abdominis,<br>external oblique,<br>internal oblique,<br>erector spinae,<br>multifidus. | double-leg bridge,                         | Wobble board.    | Floor.          | <b>Double-leg bridge</b><br>↔ EMG activity (erector spinae, multifidus)<br>↑ Unstable surface (rectus abdominis, internal oblique,<br>external oblique)                             |
|                                            |                                                                  |                                                                                               | side Bridge,                               |                  |                 | <b>Side Bridge</b><br>↑ Unstable surface (rectus abdominis, external oblique,<br>internal oblique)<br>↔ EMG activity (erector spinae, multifidus)                                   |
|                                            |                                                                  |                                                                                               | prone Plank,                               |                  |                 | <b>Prone Plank</b><br>↔ EMG activity (rectus abdominis, multifidus, erector<br>spinae, internal oblique)<br>↑ Unstable surface (external oblique)                                   |
|                                            |                                                                  |                                                                                               | supine position with hip<br>flexed at 90°, |                  |                 | <b>Supine position with hip flexed at 90°</b><br>↔ EMG activity (rectus abdominis, external oblique,<br>internal oblique)<br>Does not display the data (erector spinae, multifidus) |
|                                            |                                                                  |                                                                                               | bird dog.                                  |                  |                 | <b>Bird dog</b><br>↑ Unstable surface (rectus abdominis, external oblique,<br>internal oblique)<br>↑ Stable surface (erector spinae, multifidus)                                    |
| (LEE et al., 2017)                         | n = 6 males; 1 female<br>22,6 ± 2.23 years old                   | External oblique,<br>rectus abdominis,<br>erector spinae.                                     | Prone plank,<br>prone plank on knees.      | Dynamic cushion. | Stable surface. | <b>Prone plank</b><br>↔ EMG activity (rectus abdominis, external oblique, erector<br>spinae)                                                                                        |
|                                            |                                                                  |                                                                                               |                                            |                  |                 | <b>Prone plank on knees</b><br>↔ EMG activity (rectus abdominis, external oblique, erector<br>spinae)                                                                               |

**Table 2.** Summary of the characteristics and results of the selected studies to lower limbs muscles.

| Authors                          | Sample                                         | Muscles                                                                                         | Exercise                                                     | Unstable surface                                                     | Stable surface  | Main Results                                                                                                                      |
|----------------------------------|------------------------------------------------|-------------------------------------------------------------------------------------------------|--------------------------------------------------------------|----------------------------------------------------------------------|-----------------|-----------------------------------------------------------------------------------------------------------------------------------|
| (ANDERSON; BEHM, 2005)           | n = 14 males<br>25.2 ± 6.2 years old           | Vastus lateralis,<br>biceps femoris.                                                            | Squat,<br>Smith squat.                                       | Balance discs.                                                       | Floor.          | ↔ EMG activity (vastus lateralis, biceps femoris)                                                                                 |
|                                  |                                                |                                                                                                 |                                                              |                                                                      |                 | <b>Smith squat</b><br>↔ EMG activity (vastus lateralis, biceps femoris)                                                           |
| (MCBRIDE et al., 2010)           | n = 10 males<br>24.1 ± 2.0 years old           | Vastus lateralis,<br>biceps femoris.                                                            | Squat.                                                       | Does not specify.                                                    | Floor.          | ↑ Stable surface, except during the concentric phase of the absolute loading condition of 75 kg (vastus lateralis).               |
|                                  |                                                |                                                                                                 |                                                              |                                                                      |                 | ↑ Stable surface, during four of the twelve conditions (biceps femoris)                                                           |
| (LI; CAO; CHEN, 2013)            | n = 13 males<br>19.4 ± 1.2 years old           | Vastus lateralis,<br>vastus medialis,<br>rectus femoris,<br>biceps femoris,<br>gluteus maximus. | Squat.                                                       | Reebok Core Board.                                                   | Floor.          | ↔ EMG activity (all muscles)                                                                                                      |
| (ANDERSEN et al., 2014)          | n = 15 males<br>24 ± 4 years old               | Vastus lateralis,<br>vastus medialis,<br>rectus femoris,<br>biceps femoris.                     | Squat,<br>Bulgarian squat.                                   | Foam cushion.                                                        | Floor.          | <b>Squat</b><br>↔ EMG activity (all muscles)                                                                                      |
|                                  |                                                |                                                                                                 |                                                              |                                                                      |                 | <b>Bulgarian squat</b><br>↑ Stable surface (biceps femoris)<br>↔ EMG activity (rectus femoris, vastus lateralis, vastus medialis) |
| (NAIRN; SUTHERLAND; DRAKE, 2017) | n = 10 males<br>21 ± 3 years old               | Gluteus maximus,<br>rectus femoris,<br>biceps femoris,<br>vastus medialis.                      | Squat.                                                       | Bosu ball,<br>Tube.                                                  | Floor.          | ↔ EMG activity (gluteus maximus)<br>↑ Unstable surface (rectus femoris, vastus medialis, biceps femoris)                          |
| (HAN et al., 2017)               | n = 15 females<br>21.5 ± 0.7 years old         | Vastus medialis,<br>biceps femoris.                                                             | Half squat (70°),<br>Half squat (90°),<br>Deep squat (100°). | Aero step.                                                           | Floor.          | ↔ EMG activity (all muscles)                                                                                                      |
| (WAHL; BEHM, 2008)               | n = 16 males<br>24 ± 3.1 years old             | Biceps femoris,<br>rectus femoris                                                               | Squat (60°),<br>Forward lunge.                               | Wobble board,<br>Swiss ball,<br>Bosu up,<br>Bosu down,<br>Dyna disc. | Floor.          | ↔ EMG activity (all muscles)                                                                                                      |
| (SAETERBAKKEN; FIMLAND, 2013)    | n = 15 males<br>23.3 6 ± 2.7 years old         | Rectus femoris,<br>vastus medialis,<br>vastus lateralis,<br>biceps femoris,                     | Half squat (90°).                                            | Power board,<br>Bosu ball,<br>balance cone.                          | Floor.          | ↔ EMG activity (vastus medialis,<br>vastus lateralis, biceps femoris)                                                             |
|                                  |                                                |                                                                                                 |                                                              |                                                                      |                 | ↑ Stable surface (rectus femoris)                                                                                                 |
| (MARSHALL; MURPHY, 2006)         | n = 8 males; 4 females<br>22.1 ± 2.4 years old | Vastus lateralis,<br>biceps femoris.                                                            | Half squat (90°) ISO.                                        | Swiss ball.                                                          | Stable surface. | ↔ EMG activity (vastus lateralis, biceps femoris)                                                                                 |

**Table 2. (continued)**

|                                      |                                                    |                                                                             |                                                          |                                      |                 |                                                                                                              |
|--------------------------------------|----------------------------------------------------|-----------------------------------------------------------------------------|----------------------------------------------------------|--------------------------------------|-----------------|--------------------------------------------------------------------------------------------------------------|
| (HYONG; KANG, 2013)                  | n = 5 males; 9 females<br>21.4 years old           | Vastus medialis,<br>vastus lateralis.                                       | Squat (60°).                                             | Foam pads,<br>Rubber air discs.      | Hard plate.     | ↑ Unstable surface (all muscles)                                                                             |
| (JEON et al., 2020)                  | n = 23 males; 17 females<br>20.8±1.43 years old    | Rectus femoris,<br>vastus medialis,<br>vastus lateralis.                    | Half squat (90°).                                        | Bosu ball,<br>Swiss ball.            | Floor.          | ↔ EMG activity (all muscles)                                                                                 |
| (KANG et al., 2017)                  | n = 24 males<br>26.04 ± 2.19 years old             | vastus medialis,<br>vastus lateralis.                                       | Squat (15°) ISO,<br>Squat (45°) ISO,<br>Squat (60°) ISO. | Aerostep.                            | Stable surface. | <b>Squat (15°) ISO</b><br>↑ Unstable surface (vastus medialis)<br>↔ EMG activity (vastus lateralis)          |
|                                      |                                                    |                                                                             |                                                          |                                      |                 | <b>Squat (45°) ISO</b><br>↔ EMG activity (all muscles)                                                       |
|                                      |                                                    |                                                                             |                                                          |                                      |                 | <b>Squat (60°) ISO</b><br>↑ Stable surface (vastus medialis)<br>↔ EMG activity (vastus lateralis)            |
| (MCBRIDE; CORMIE;<br>DEANE, 2006)    | n = 9 males<br>22.4 ± 2.7 years old                | Vastus medialis,<br>vastus lateralis,<br>biceps femoris.                    | Deep squat (100°).                                       | Inflated balance disk.               | Force plate.    | ↑ Stable surface (vastus medialis, lateralis)<br>↔ EMG activity (biceps femoris)                             |
| (ARANDA et al., 2016)                | n = 19 males<br>24.65 ± 3.48 years old             | Biceps femoris,<br>vastus lateralis.                                        | Squat.                                                   | Balance disc.                        | Floor.          | ↔ EMG activity (all muscles)                                                                                 |
| (MARÍN; HAZELL,<br>2014)             | n = 23 males; 5 females<br>21.7 ± 1.3 years old    | Vastus medialis,<br>vastus lateralis.                                       | Squat (60°).                                             | Wobble board.<br>Vibration platform. | Floor.          | ↑ Unstable surface-vibration platform 30 Hz (vastus<br>medialis)<br>↔ EMG activity (vastus lateralis)        |
| (PARK et al., 2015)                  | n = 12 males; 13 females<br>25.19 ± 2.48 years old | Vastus medialis,<br>vastus lateralis.                                       | Squat (60°)<br>(Vision Allowed).                         | Foam pad.                            | Floor.          | <b>Vision Allowed</b><br>↑ Unstable surface (all muscles)                                                    |
| (AGUILERA-<br>CASTELLS et al., 2019) | n = 20 males<br>24.40 ± 3.63 years old             | Rectus femoris,<br>biceps femoris,<br>vastus medialis,<br>vastus lateralis. | Bulgarian squat.                                         | Bosu ball,<br>TRX.                   | Floor.          | ↑ Unstable surface (rectus femoris)<br>↔ EMG activity (vastus lateralis, vastus medialis, biceps<br>femoris) |
| (KIM et al., 2013)                   | n = 11 males; 11 females<br>23.5 ± 4.92 years old  | Ipsilateral gluteus<br>maximus,<br>ipsilateral biceps<br>femoris.           | Prone hip extension.                                     | Foam roll.                           | Floor.          | ↑ Unstable surface (ipsilateral gluteus maximus)<br>↔ EMG activity (ipsilateral biceps femoris)              |
| (MILLER et al., 2019)                | n = 9 males; 10 females<br>21.45± 1.8 years old    | Rectus femoris,<br>gluteus maximus                                          | Split squat.                                             | TRX.                                 | Stable bench.   | ↑ Unstable surface (gluteus maximus)<br>↔ EMG activity (rectus femoris)                                      |
| (KRAUSE et al., 2018)                | n = 15 males; 15 females<br>23.9 ± 1.7 years old   | Rectus femoris,<br>hamstring,<br>gluteus maximus.                           | Standart lunge.                                          | TRX.                                 | Floor.          | ↑ Unstable surface (hamstring, gluteus maximus)<br>↔ EMG activity (rectus femoris)                           |

**Table 2. (continued)**

|                                 |                                                  |                                                                                                                    |                                                                                     |                                                                |                                                             |                                                                                                                                                                                                                                              |
|---------------------------------|--------------------------------------------------|--------------------------------------------------------------------------------------------------------------------|-------------------------------------------------------------------------------------|----------------------------------------------------------------|-------------------------------------------------------------|----------------------------------------------------------------------------------------------------------------------------------------------------------------------------------------------------------------------------------------------|
| (BOUILLON et al., 2019)         | n = 7 males; 13 females<br>23.4 ± 1.47 years old | Rectus femoris,<br>vastus medialis,<br>biceps femoris.                                                             | Standart lunge.                                                                     | Stepright,<br>Bosu.                                            | Firm surface.                                               | ↔ EMG activity (biceps femoris, rectus femoris, vastus medialis)<br><br>However, the Stepright device showed ↑ EMG activity when compared to the Bosu ball, but with no difference for the stable surface (rectus femoris, vastus medialis). |
| (LEE; CHOI; KIM, 2017)          | n = 15 males<br>22.0 ± 2.0 years old             | Vastus lateralis,<br>vastus medialis,<br>rectus femoris.                                                           | Standing position with<br>extension of the knee<br>joint.                           | Aero step (the plate that<br>could be tilted at 0° and<br>20°) | Floor (the plate that<br>could be tilted at 0° and<br>20°). | <b>Not Inclined board 0°</b><br>↔ EMG activity (all muscles)<br><br><b>Inclined board 20°</b><br>↑ Unstable surface (vastus lateralis, vastus medialis, rectus femoris)                                                                      |
| (BEHM; ANDERSON; CURNEW, 2002)  | n = 8 males<br>24.3 ± 6.7 years old              | Quadriceps,<br>soleus.                                                                                             | Unilateral knee<br>extension, seated.<br><br>Unilateral plantar<br>flexion, seated. | Swiss ball                                                     | Bench.                                                      | <b>Unilateral knee extension seated.</b><br>↑ Stable surface (quadriceps).<br><br><b>Unilateral plantar flexion seated.</b><br>↑ Unstable surface (soleus)                                                                                   |
| (BUSCÀ et al., 2020)            | n = 5 males; 9 females<br>20.2 ± 1.54 years old  | Vastus medialis,<br>vastus lateralis,<br>biceps femoris.                                                           | Squat.                                                                              | Foam,<br>Bosu-up,<br>Bosu-down.                                | Floor.                                                      | ↑ Unstable surface—Bosu-up (vastus medialis)<br><br>↑ Unstable surface—Bosu-down (vastus lateralis)<br><br>↑ Unstable surface—Bosu-down and Bosu-up (biceps femoris)                                                                         |
| (KIM et al., 2021)              | n = 22 males<br>22.5 ± 2.7 years old             | Rectus femoris,<br>vastus lateralis,<br>vastus medialis,<br>biceps femoris,<br>semitendinosus,<br>semimembranosus. | Squat,<br>wall squat,<br>Spanish squat.                                             | Swiss ball,<br>Bosu ball.                                      | Floor.                                                      | <b>Squat and Wall squat</b><br>↔ EMG activity (all muscles)<br><br><b>Spanish squat</b><br>↔ EMG activity (rectus femoris, vastus lateralis, vastus medialis, biceps femoris, semimembranosus)<br>↑ Unstable surface (semitendinosus)        |
| (GÜNDOĞAN; AYDIN; SAĞLAM, 2023) | n = 14 males<br>20.4 ± 1.2 years old             | Vastus medialis,<br>vastus lateralis                                                                               | Squat                                                                               | Gymnastics mat,<br>Bosu ball                                   | Stable surface.                                             | ↔ EMG activity (all muscles)                                                                                                                                                                                                                 |
| (MAIOR et al., 2009)            | n = 20 males<br>25 ± 3 years old                 | Rectus femoris,<br>vastus lateralis,<br>vastus medialis                                                            | Squat                                                                               | Core Board<br>Training®                                        | Floor                                                       | ↑ Unstable surface (all muscles)                                                                                                                                                                                                             |

Legends: ISO – Isometric.



**Table 3.** Summary of the characteristics and results of the selected studies to upper limbs muscles.

| Authors                    | Sample                                             | Muscles                                              | Exercise               | Unstable surface                                                                                              | Stable surface       | Main Results                                                                                                                                                                                                                                                     |
|----------------------------|----------------------------------------------------|------------------------------------------------------|------------------------|---------------------------------------------------------------------------------------------------------------|----------------------|------------------------------------------------------------------------------------------------------------------------------------------------------------------------------------------------------------------------------------------------------------------|
| (JEONG; CHUNG; SHIM, 2014) | n = 10 males; 18 females<br>23.67 ± 2.67 years old | Anterior deltoid.                                    | Push up plus           | Slings.                                                                                                       | Stable surface.      | ↑ Unstable surface (anterior deltoid)<br><br><b>Push up with the support of the devices on the hands.</b><br>↑ Unstable surface (triceps brachii)<br>↔ EMG activity (pectoralis major)                                                                           |
| (LEHMAN et al., 2006)      | n = 13 males<br>26.3 ± 1.5 years old               | Pectoralis major, triceps brachii.                   | Push up, Push up plus. | Swiss ball.                                                                                                   | Bench.               | <b>Push up with the support of the devices on the feet.</b><br>↔ EMG activity (pectoralis major, triceps brachii)<br><br><b>Push up plus</b><br>↑ Unstable surface (triceps brachii)<br>↔ EMG activity (pectoralis major)<br>↑ Stable surface (anterior deltoid) |
| (TORRES et al., 2017)      | n = 20 males<br>20.9 ± 1.8 years old               | Anterior deltoid, triceps brachii, pectoralis major. | Push up plus.          | Bosu ball.                                                                                                    | Floor.               | ↔ EMG activity (triceps brachii, pectoralis major)<br>↑ Unstable surface (triceps brachii) in soccer players group<br>↔ EMG activity (triceps brachii) in gymnasts and sedentary group                                                                           |
| (SYED-ABDUL et al., 2018)  | n = 69 females<br>Range 18-24 years old            | Anterior deltoid, triceps brachii.                   | Push up.               | Suspension tape at a standardized height of 213.4 cm, with handles approximately 7.5-12.5 cm above the floor. | Floor.               | ↑ Unstable surface (anterior deltoid) in soccer players and gymnasts group<br>↔ EMG activity (anterior deltoid) in sedentary group                                                                                                                               |
| (HWANGBO; KIM, 2012)       | n = 39 males; 6 females<br>25.3 ± 2.2 years old    | Pectoralis major, triceps brachii.                   | Push up.               | Swiss ball.                                                                                                   | Table.               | <b>Push up with dorsiflexion.</b><br>↑ Unstable surface (pectoralis major)<br>↔ EMG activity (triceps brachii)<br><br><b>Push up with plantarflexion.</b><br>↔ EMG activity (pectoralis major, triceps brachii)                                                  |
| (PARK et al., 2013)        | n = 16 males<br>24-26 years old                    | Triceps brachii.                                     | Push up.               | Wobble board.                                                                                                 | Stable surface.      | ↑ Unstable surface (triceps brachii)                                                                                                                                                                                                                             |
| (CALATAYUD et al., 2014a)  | n = 29 males<br>2.5 ± 2.0 years old                | Pectoralis major, anterior deltoid, triceps brachii. | Push up.               | TRX.                                                                                                          | Floor.               | ↑ Unstable surface—Suspended push up with open eyes (pectoralis major, triceps brachii)<br><br>↑ Stable surface (anterior deltoid)                                                                                                                               |
| (MARSHALL; MURPHY, 2006a)  | n = 8 males; 4 females<br>22.1 ± 2.4 years old     | Pectoralis major, triceps brachii                    | Push up.               | Swiss ball.                                                                                                   | Stable surface.      | ↔ EMG activity (pectoralis major)<br>↑ Unstable surface (triceps brachii)                                                                                                                                                                                        |
| (DE ARAÚJO et al., 2011)   | n = 12 males<br>22 ± 3 years old                   | Pectoralis major, triceps brachii.                   | One-arm knee press up. | Swiss ball.                                                                                                   | Stable wooden stand. | ↑ Unstable surface (Pectoralis major, triceps brachii)                                                                                                                                                                                                           |

**Table 3. (continued).**

|                                                        |                                       |                                                            |                                                                                             |                                                                              |                                 |                                                                                                                                                                                                                                                                                                                                                                                                                       |
|--------------------------------------------------------|---------------------------------------|------------------------------------------------------------|---------------------------------------------------------------------------------------------|------------------------------------------------------------------------------|---------------------------------|-----------------------------------------------------------------------------------------------------------------------------------------------------------------------------------------------------------------------------------------------------------------------------------------------------------------------------------------------------------------------------------------------------------------------|
| (BEZERRA et al., 2020)                                 | n = 10 males<br>26 ± 5 years old      | Pectoralis major,<br>triceps brachii,<br>anterior deltoid. | Push up.                                                                                    | Swiss ball.                                                                  | Floor.                          | ↔ EMG activity (pectoralis major)<br>↑ Stable surface (anterior deltoid)<br>↑ Unstable surface (triceps brachii)                                                                                                                                                                                                                                                                                                      |
| (DE OLIVEIRA; DE<br>MORAIS CARVALHO;<br>DE BRUM, 2008) | n = 20 males<br>23 ± 7 years old      | Anterior deltoid,<br>pectoralis major.                     | Wall-press,<br>push-up,<br>bench-press.                                                     | Medicine ball.                                                               | Stable surface.                 | <b>Wall-press</b><br>↑ Unstable surface (anterior deltoid)<br>↔ EMG activity (pectoralis major)<br><b>Push-up</b><br>↑ Unstable surface (anterior deltoid)<br>↑ Stable surface (pectoralis major)<br><b>Bench-press</b><br>↑ Unstable surface (anterior deltoid)<br>↔ EMG activity (pectoralis major)                                                                                                                 |
| (SANDHU;<br>MAHAJAN; SHENOY,<br>2008)                  | n = 35 males<br>Range 20-30 years old | Pectoralis major,<br>triceps brachii.                      | Push-up,<br>knee push-up,<br>elbow push-up,<br>wall press.                                  | Swiss ball.                                                                  | Stable surface.                 | <b>Push-up (concentric phase)</b><br>↑ Unstable surface (pectoralis major, triceps brachii)<br><b>Knee push-up (concentric phase)</b><br>↑ Unstable surface (pectoralis major, triceps brachii)<br><b>Elbow push-up (concentric phase)</b><br>↔ EMG activity (pectoralis major, triceps brachii)<br><b>Wall press (concentric phase)</b><br>↔ EMG activity (triceps brachii)<br>↑ Unstable surface (pectoralis major) |
| (BORREANI et al.,<br>2015b)                            | n = 29 males<br>23.5 ± 3.1 years old  | Triceps brachii,<br>anterior deltoid,<br>pectoralis major. | Push-ups with their<br>hands at 2 different<br>heights (10 cm and 65<br>cm from the floor). | TRX.                                                                         | Box,<br>bar in a Smith machine. | <b>Exercise 10 cm from the floor</b><br>↔ EMG activity (pectoralis major)<br>↑ Unstable surface (triceps brachii)<br>↑ Stable surface (anterior deltoid)<br><b>Exercise 65 cm from the floor</b><br>↔ EMG activity (pectoralis major)<br>↑ Unstable surface (triceps brachii)<br>↑ Stable surface (anterior deltoid)                                                                                                  |
| (BORREANI et al.,<br>2015a)                            | n = 30 males<br>23 ± 1.13 years old   | Anterior deltoid.                                          | Push-ups.                                                                                   | Wobble board,<br>Stability disc,<br>Bosu ball,<br>TRX Suspension<br>Trainer. | Floor.                          | ↔ EMG activity (anterior deltoid)                                                                                                                                                                                                                                                                                                                                                                                     |

**Table 3. (continued).**

|                                           |                                                   |                                                                                                        |                                                                            |                                                                                |                 |                                                                                                                                                                                                  |
|-------------------------------------------|---------------------------------------------------|--------------------------------------------------------------------------------------------------------|----------------------------------------------------------------------------|--------------------------------------------------------------------------------|-----------------|--------------------------------------------------------------------------------------------------------------------------------------------------------------------------------------------------|
| (CALATAYUD et al., 2014b)                 | n = 29 males<br>23.5 ± 3.1 years old              | Triceps brachii,<br>anterior deltoid,<br>pectoralis major.                                             | Push-Ups.                                                                  | TRX Suspension<br>Trainer,<br>Jungle Gym XT,<br>Flying,<br>AirFit Trainer Pro. | Floor.          | ↑ Unstable surface— AirFit Trainer Pro (triceps brachii)<br>↑ Unstable surface— Jungle Gym XT (clavicular pectoralis)<br>↑ Stable surface (anterior deltoid), but no difference to Jungle Gym XT |
| (SNARR; ESCO, 2013)                       | n = 15 males; 6 females<br>25.24 ± 3.42 years old | Pectoralis major,<br>anterior deltoid,<br>triceps brachii.                                             | Push-up.                                                                   | TRX.                                                                           | Floor.          | ↑ Unstable surface (all muscles)                                                                                                                                                                 |
| (HERRINGTON;<br>WATERMAN;<br>SMITH, 2015) | n = 10 males; 11 females<br>22.8 ± 1.4 years old  | Anterior deltoid,<br>pectoralis major.                                                                 | One-arm knee press up,<br>one-arm press up,<br>two-arm press up.           | Airex pad,<br>Swiss ball.                                                      | Floor.          | <b>One-arm knee press up</b><br>↔ EMG activity (pectoralis major, anterior deltoid)                                                                                                              |
|                                           |                                                   |                                                                                                        |                                                                            |                                                                                |                 | <b>One-arm press up</b><br>↔ EMG activity (pectoralis major, anterior deltoid)                                                                                                                   |
|                                           |                                                   |                                                                                                        |                                                                            |                                                                                |                 | <b>Two-arm press up</b><br>↔ EMG activity (pectoralis major)<br>↑ Stable surface (anterior deltoid)<br>↑ Stable surface (anterior deltoid)                                                       |
| (PONTILLO et al., 2007)                   | n = 10 males; 5 females<br>30 ± 6 years old       | Anterior deltoid,<br>pectoralis major,<br>triceps brachii.                                             | One-arm knee press up.                                                     | Thera-Band® stability<br>trainer.                                              | Force platform. | ↑ Stable surface (anterior deltoid)<br>↑ Unstable surface (triceps brachii)<br>↔ EMG activity (pectoralis major)                                                                                 |
| (DE MEY et al., 2014)                     | n = 26 males; 21 females<br>22 ± 4.31 years old   | Pectoralis major,<br>anterior deltoid,<br>latissimus dorsi,<br>posterior deltoid,<br>middle trapezius. | Half push-up,<br>knee push-up,<br>knee prone bridging<br>plus,<br>pull-up. | Redcord slings.                                                                | Bar,<br>floor.  | <b>Half push-up</b><br>↑ Unstable surface (pectoralis major)<br>↔ EMG activity (anterior deltoid)                                                                                                |
|                                           |                                                   |                                                                                                        |                                                                            |                                                                                |                 | <b>Knee push-up</b><br>↑ Stable surface (anterior deltoid)<br>↔ EMG activity (pectoralis major)                                                                                                  |
|                                           |                                                   |                                                                                                        |                                                                            |                                                                                |                 | <b>Knee prone bridging plus</b><br>↑ Stable surface (anterior deltoid)<br>↑ Unstable surface (pectoralis major)                                                                                  |
|                                           |                                                   |                                                                                                        |                                                                            |                                                                                |                 | <b>Pull-up</b><br>↑ Stable surface (middle trapezius, lower trapezius)<br>↑ Unstable surface (latissimus dorsi)<br>↔ EMG activity (posterior deltoid)                                            |
| (ANDERSON et al., 2013)                   | n = 10 males; 5 females<br>29.3 ± 6.4 years old   | Triceps brachii.                                                                                       | Push up.                                                                   | Extreme balance board,<br>stability ball.                                      | Floor.          | ↑ Unstable surface – Dual instability (triceps brachii)                                                                                                                                          |

**Table 3. (continued).**

|                                  |                                                                                         |                                                                                 |                                                   |                                 |                 |                                                                                                                                                                                                                                               |
|----------------------------------|-----------------------------------------------------------------------------------------|---------------------------------------------------------------------------------|---------------------------------------------------|---------------------------------|-----------------|-----------------------------------------------------------------------------------------------------------------------------------------------------------------------------------------------------------------------------------------------|
| (YOUDAS et al., 2020)            | n = 13 males; 13 females<br>24.2 ± 3.6 years old                                        | Biceps brachii,<br>latissimus dorsi,<br>posterior deltoid,<br>middle trapezius. | Inverted row.                                     | Bosu ball.                      | Floor.          | ↔ EMG activity (all muscles)                                                                                                                                                                                                                  |
| (KIM et al., 2012)               | n = 33 (does not inform<br>the gender of the<br>participants)<br>21.61 ± 1.32 years old | Pectoralis major,<br>triceps brachii.                                           | Push up.                                          | Swiss ball.                     | Bench.          | <b>Supports in the ankle region</b><br>↑ Unstable surface (all muscles)<br><br><b>Supports in the knee region</b><br>↑ Unstable surface (all muscles)<br>↑ Unstable surface (Pectoralis major)                                                |
| (PARK; YOO, 2013)                | n = 14 males<br>22 ± 2 years old                                                        | Pectoralis major,<br>triceps brachii.                                           | Push up.                                          | Wobble board.                   | Stable surface. | ↔ EMG activity<br>(triceps brachii)                                                                                                                                                                                                           |
| (PATTERSON et al.,<br>2015)      | n = 15 males; 7 females<br>22.4 ± 5.0 years old                                         | Pectoralis major.                                                               | Unilateral chest press,<br>bilateral chest press. | COR bench.                      | Flat bench.     | <b>Unilateral chest press</b><br>↔ EMG activity (pectoralis major)<br><br><b>Bilateral chest press</b><br>↔ EMG activity (pectoralis major)                                                                                                   |
| (ANDERSON; BEHM,<br>2004)        | n = 10 males<br>26.3 ± 6.0 years old                                                    | Pectoralis major,<br>anterior deltoid,<br>triceps brachii.                      | Chest press.                                      | Swiss ball.                     | Bench.          | <b>Dynamic condition</b><br>↔ EMG activity (all muscles)<br><br><b>Isometric condition</b><br>↔ EMG activity (all muscles)                                                                                                                    |
| (MARSHALL;<br>MURPHY, 2006b)     | n = 9 males; 5 females<br>23.6 ± 1.6 years old                                          | Anterior deltoid,<br>triceps brachii,<br>pectoralis major.                      | Chest press.                                      | Swiss ball.                     | Bench.          | ↑ Unstable surface (anterior deltoid)<br>↔ EMG activity (triceps brachii, pectoralis major)                                                                                                                                                   |
| (SAETERBAKKEN;<br>FIMLAND, 2013) | n = 16 males<br>22.5 ± 2.0 years old                                                    | Pectoralis major,<br>anterior deltoid,<br>triceps brachii.                      | Bench press.                                      | Swiss ball,<br>balance cushion. | Bench.          | <b>Swiss ball</b><br>↓ Unstable surface (pectoralis major, triceps brachii)<br>↔ EMG activity (anterior deltoid)<br><br><b>Balance cushion</b><br>↓ Unstable surface (triceps brachii)<br>↔ EMG activity (anterior deltoid, pectoralis major) |
| (URIBE et al., 2010)             | n = 16 males<br>24.1 ± 2.1 years old                                                    | Anterior deltoid,<br>pectoralis major.                                          | Chest press,<br>shoulder press.                   | Swiss ball.                     | Bench.          | <b>Chest press</b><br>↔ EMG activity (all muscles)<br><br><b>Shoulder press</b><br>↔ EMG activity (all muscles)                                                                                                                               |
| (PALMA et al., 2021)             | n = 12 males<br>23.7 ± 3.0 years old                                                    | Pectoralis major.                                                               | Push up.                                          | Bosu,<br>balance disc,<br>TRX.  | Floor.          | ↔ EMG activity (Pectoralis major)                                                                                                                                                                                                             |

**Table 3. (continued).**

|                                         |                                             |                                                                               |                                                               |                              |                  |                                                                                                                                                                                                                                                                                                                                                 |
|-----------------------------------------|---------------------------------------------|-------------------------------------------------------------------------------|---------------------------------------------------------------|------------------------------|------------------|-------------------------------------------------------------------------------------------------------------------------------------------------------------------------------------------------------------------------------------------------------------------------------------------------------------------------------------------------|
| (KOHLER;<br>FLANAGAN;<br>WHITING, 2010) | n = 24 males; 6 females<br>30 ± 8 years old | Anterior deltoid,<br>middle deltoid,<br>upper trapezius,<br>triceps brachii.  | Shoulder press with bar,<br>shoulder press with<br>dumbbells. | Swiss ball.                  | Bench.           | <p><b>Shoulder press with bar</b><br/>↔ EMG activity (anterior deltoid, middle deltoid, upper trapezius)<br/>↑ Stable surface (triceps brachii)</p> <p><b>Shoulder press with dumbbells</b><br/>↔ EMG activity (anterior deltoid, middle deltoid, upper trapezius)<br/>↑ Stable surface (triceps brachii)</p>                                   |
| (NAIRN;<br>SUTHERLAND;<br>DRAKE, 2015)  | n = 10 males<br>21 ± 3 years old            | Pectoralis major,<br>triceps brachii,<br>anterior deltoid.                    | Bench press.                                                  | Tube,<br>Swiss ball.         | Bench.           | <p>↑ Stable surface – When performed with the barbell in the concentric phase (pectoralis major, triceps brachii)</p> <p>↑ Unstable surface - When performed on the Swiss ball for the concentric phase (anterior deltoid)</p>                                                                                                                  |
| (ARANDA et al., 2016)                   | n = 19 males<br>24.65 ± 3.48 years old      | Anterior deltoid,<br>pectoralis major.                                        | Bench press.                                                  | Swiss ball,<br>Balance disk. | Bench,<br>floor. | ↔ EMG activity (all muscles)                                                                                                                                                                                                                                                                                                                    |
| (NASCIMENTO et al., 2017)               | n = 20 males<br>20.9 ± 1.8 years old        | Anterior deltoid,<br>pectoralis major,<br>biceps brachii,<br>triceps brachii. | Horizontal dumbbell fly,<br>bench press.                      | Proprioceptive disc.         | Bench.           | <p><b>Horizontal Dumbbell Fly</b><br/>↑ Unstable surface (anterior deltoid, biceps brachii, pectoralis major)</p> <p><b>Bench press</b><br/>↑ Unstable surface (pectoralis major)<br/>↔ EMG activity (anterior deltoid, triceps brachii).</p>                                                                                                   |
| (REISER et al., 2017)                   | n = 17 males<br>26 ± 6.4 years old          | Anterior deltoid,<br>pectoralis major.                                        | Horizontal dumbbell fly.                                      | Swiss ball.                  | Bench.           | ↔ EMG activity (all muscles)                                                                                                                                                                                                                                                                                                                    |
| (MELO et al., 2014)                     | n = 14 males<br>22,5 ± 2,4 years old        | Pectoralis major, anterior<br>deltoid.                                        | Horizontal dumbbell fly.                                      | Swiss ball.                  | Flat bench.      | ↑ Unstable surface (all muscles)                                                                                                                                                                                                                                                                                                                |
| (SOUSA et al., 2022)                    | n = 28 males<br>24.6 ± 3.5 years old        | Anterior deltoid,<br>biceps brachii,<br>pectoralis major,<br>triceps brachii. | Horizontal dumbbell fly,<br>bench press.                      | Swiss ball.                  | Flat bench.      | <p><b>Horizontal Dumbbell Fly</b><br/>Control group<br/>↔ EMG activity (all muscles)<br/>Dyskinesia group<br/>↔ EMG activity (all muscles)</p> <p><b>Bench press</b><br/>Control group<br/>↑ Stable surface (anterior deltoid)<br/>↔ EMG activity (pectoralis major, triceps brachii)<br/>Dyskinesia group<br/>↔ EMG activity (all muscles)</p> |
