# Supplementary material for: Comparison of the Electromyography Activity during Exercises with Stable and Unstable Surfaces: A Systematic Review and Meta-Analysis
Source: MDPI journal article supplement (doi:10.3390/sports12040111), 2024-04-18
Supplement: s1 [file s1]

**Title:** Comparison of the electromyography activity during exercises with stable and unstable surfaces: A systematic review and meta-analysis

**Supplementary Online Material S2**

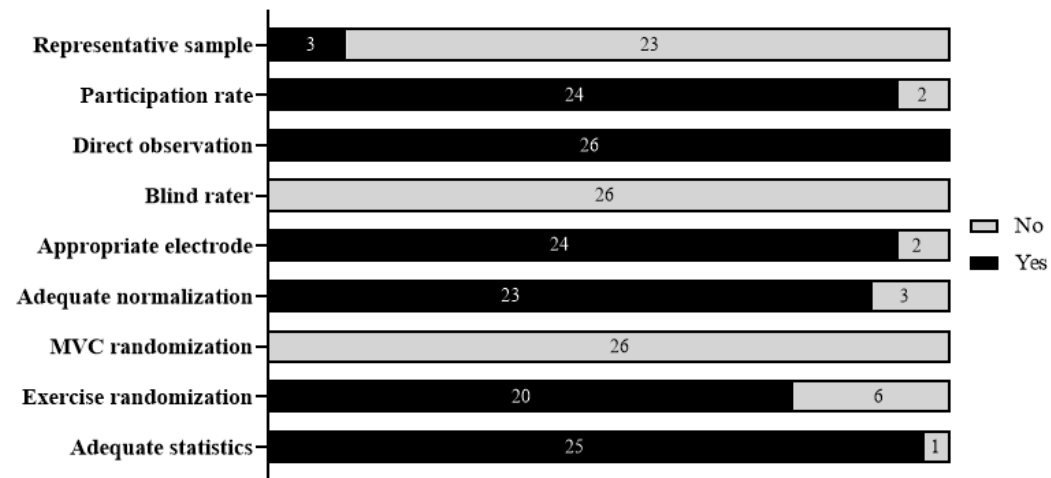

**Figure 1.** Methodological quality of the studies that evaluated the core musculature.

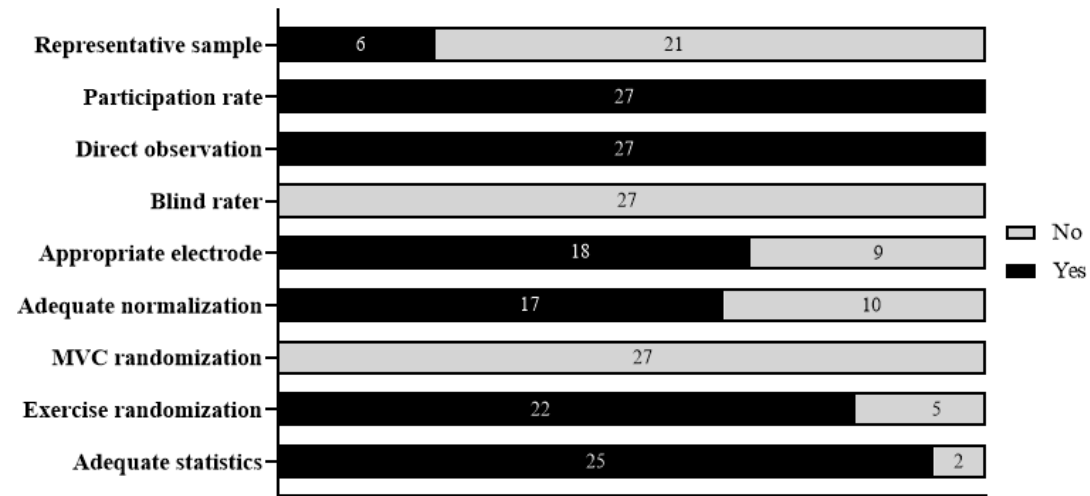

**Figure 2.** Methodological quality of the studies that evaluated the lower limbs musculature.

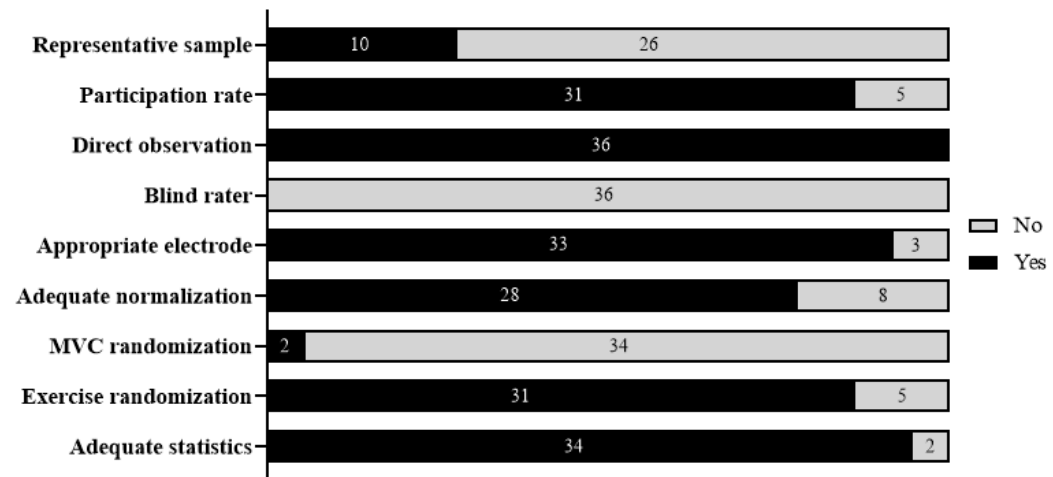

**Figure 3.** Methodological quality of the studies that evaluated the upper limbs musculature.
