# Supplementary material for: Comparison of the Electromyography Activity during Exercises with Stable and Unstable Surfaces: A Systematic Review and Meta-Analysis
Source: MDPI journal article supplement (doi:10.3390/sports12040111), 2024-04-18
Supplement: s1 [file s1]

**Title:** Comparison of the electromyography activity during exercises with stable and unstable surfaces: A systematic review and meta-analysis

**Supplementary Online Material S3**

**Table 1.** Evaluation of the quality of the selected studies with evaluations of internal validity and external validity of core muscles.

| No/Author/year                       | External Validity     |                    | Internal Validity  |             |                       |                        |                   |                        |                     |             |
|--------------------------------------|-----------------------|--------------------|--------------------|-------------|-----------------------|------------------------|-------------------|------------------------|---------------------|-------------|
|                                      | Representative sample | Participation rate | Performance        | Detection   | Selection Bias        |                        |                   |                        |                     |             |
|                                      |                       |                    | Direct observation | Blind rater | Appropriate electrode | Adequate normalization | MVC randomization | Exercise randomization | Adequate statistics | Total score |
| (BEHM et al., 2005)                  | No                    | Yes                | Yes                | No          | Yes                   | Yes                    | No                | Yes                    | Yes                 | 6           |
| (IMAI et al., 2010)                  | No                    | Yes                | Yes                | No          | Yes                   | Yes                    | No                | No                     | Yes                 | 5           |
| (KIM; KIM; CHUNG, 2014)              | No                    | Yes                | Yes                | No          | Yes                   | Yes                    | No                | No                     | Yes                 | 5           |
| (HA et al., 2015)                    | No                    | Yes                | Yes                | No          | Yes                   | Yes                    | No                | Yes                    | Yes                 | 6           |
| (KIM et al., 2018)                   | No                    | Yes                | Yes                | No          | Yes                   | Yes                    | No                | Yes                    | Yes                 | 6           |
| (SUNDSTRUP et al., 2012)             | No                    | Yes                | Yes                | No          | Yes                   | Yes                    | No                | Yes                    | Yes                 | 6           |
| (LEHMAN et al., 2005)                | No                    | Yes                | Yes                | No          | Yes                   | Yes                    | No                | No                     | Yes                 | 5           |
| (YOUDAS et al., 2015)                | Yes                   | Yes                | Yes                | No          | Yes                   | Yes                    | No                | Yes                    | Yes                 | 7           |
| (YOUDAS et al., 2017)                | Yes                   | Yes                | Yes                | No          | Yes                   | Yes                    | No                | Yes                    | Yes                 | 7           |
| (VILAÇA-ALVES et al., 2016)          | No                    | Yes                | Yes                | No          | Yes                   | No                     | No                | Yes                    | Yes                 | 5           |
| (SNARR; ESCO, 2014)                  | No                    | Yes                | Yes                | No          | Yes                   | Yes                    | No                | Yes                    | Yes                 | 6           |
| (ATKINS et al., 2015)                | No                    | Yes                | Yes                | No          | Yes                   | Yes                    | No                | Yes                    | Yes                 | 6           |
| (STERNLICHT et al., 2007)            | No                    | Yes                | Yes                | No          | Yes                   | No                     | No                | Yes                    | Yes                 | 5           |
| (FELDWIESER et al., 2012)            | No                    | Yes                | Yes                | No          | Yes                   | Yes                    | No                | Yes                    | Yes                 | 6           |
| (KIM; OH, 2015)                      | No                    | Yes                | Yes                | No          | Yes                   | Yes                    | No                | Yes                    | Yes                 | 6           |
| (LEE; PARK; LEE, 2015)               | No                    | Yes                | Yes                | No          | No                    | Yes                    | No                | Yes                    | Yes                 | 5           |
| (SAETERBAKKEN et al., 2014)          | No                    | Yes                | Yes                | No          | Yes                   | No                     | No                | Yes                    | Yes                 | 5           |
| (BYRNE et al., 2014)                 | No                    | No                 | Yes                | No          | Yes                   | Yes                    | No                | Yes                    | Yes                 | 5           |
| (YOON et al., 2018)                  | No                    | Yes                | Yes                | No          | Yes                   | Yes                    | No                | Yes                    | Yes                 | 6           |
| (KIM et al., 2011)                   | No                    | Yes                | Yes                | No          | Yes                   | Yes                    | No                | Yes                    | Yes                 | 6           |
| (MARSHALL; MURPHY, 2006)             | Yes                   | Yes                | Yes                | No          | Yes                   | Yes                    | No                | Yes                    | Yes                 | 7           |
| (ANDRADE et al., 2015)               | No                    | Yes                | Yes                | No          | Yes                   | Yes                    | No                | No                     | Yes                 | 5           |
| (BISCARINI; CONTEMORI; GROLLA, 2019) | No                    | Yes                | Yes                | No          | No                    | Yes                    | No                | Yes                    | Yes                 | 5           |
| (CZAPROWSKI et al., 2014)            | No                    | Yes                | Yes                | No          | Yes                   | Yes                    | No                | Yes                    | Yes                 | 6           |
| (LEE et al., 2017)                   | No                    | No                 | Yes                | No          | Yes                   | Yes                    | No                | No                     | No                  | 3           |
| (LUK et al., 2021)                   | No                    | Yes                | Yes                | No          | Yes                   | Yes                    | No                | No                     | Yes                 | 5           |

**Table 2.** Evaluation of the quality of the selected studies with evaluations of internal validity and external validity of lower limbs muscles.

| Author/year                      | External Validity     |                    | Internal Validity  |             |                       |                        |                   |                        |                     |             |
|----------------------------------|-----------------------|--------------------|--------------------|-------------|-----------------------|------------------------|-------------------|------------------------|---------------------|-------------|
|                                  | Representative sample | Participation rate | Performance        | Detection   | Selection Bias        |                        |                   |                        |                     |             |
|                                  |                       |                    | Direct observation | Blind rater | Appropriate electrode | Adequate normalization | MVC randomization | Exercise randomization | Adequate statistics | Total score |
| (ANDERSON; BEHM, 2005)           | No                    | Yes                | Yes                | No          | Yes                   | No                     | No                | Yes                    | Yes                 | 5           |
| (LEE; CHOI; KIM, 2017)           | No                    | Yes                | Yes                | No          | No                    | Yes                    | No                | No                     | Yes                 | 4           |
| (HAN et al., 2017)               | No                    | Yes                | Yes                | No          | No                    | No                     | No                | No                     | Yes                 | 3           |
| (LI; CAO; CHEN, 2013)            | No                    | Yes                | Yes                | No          | Yes                   | No                     | No                | Yes                    | Yes                 | 5           |
| (WAHL; BEHM, 2008)               | No                    | Yes                | Yes                | No          | Yes                   | No                     | No                | Yes                    | Yes                 | 5           |
| (SAETERBAKKEN; FIMLAND, 2013)    | No                    | Yes                | Yes                | No          | Yes                   | No                     | No                | Yes                    | Yes                 | 5           |
| (BEHM; ANDERSON; CURNEW, 2002)   | Yes                   | Yes                | Yes                | No          | Yes                   | No                     | No                | No                     | Yes                 | 5           |
| (AGUILERA-CASTELLS et al., 2019) | Yes                   | Yes                | Yes                | No          | Yes                   | Yes                    | No                | Yes                    | Yes                 | 7           |
| (ANDERSEN et al., 2014)          | No                    | Yes                | Yes                | No          | Yes                   | Yes                    | No                | Yes                    | Yes                 | 6           |
| (NAIRN; SUTHERLAND; DRAKE, 2017) | No                    | Yes                | Yes                | No          | Yes                   | Yes                    | No                | Yes                    | Yes                 | 6           |
| (KRAUSE et al., 2018b)           | Yes                   | Yes                | Yes                | No          | Yes                   | Yes                    | No                | Yes                    | Yes                 | 7           |
| (ARANDA et al., 2016)            | No                    | Yes                | Yes                | No          | Yes                   | Yes                    | No                | Yes                    | Yes                 | 6           |
| (MARÍN; HAZELL, 2014)            | No                    | Yes                | Yes                | No          | Yes                   | Yes                    | No                | Yes                    | Yes                 | 6           |
| (PARK et al., 2015)              | No                    | Yes                | Yes                | No          | No                    | No                     | No                | No                     | Yes                 | 3           |
| (MCBRIDE et al., 2010)           | No                    | Yes                | Yes                | No          | Yes                   | No                     | No                | Yes                    | Yes                 | 5           |
| (KIM et al., 2013)               | No                    | Yes                | Yes                | No          | Yes                   | Yes                    | No                | Yes                    | Yes                 | 6           |
| (MILLER et al., 2019)            | Yes                   | Yes                | Yes                | No          | Yes                   | Yes                    | No                | Yes                    | Yes                 | 7           |
| (BOUILLON et al., 2019)          | No                    | Yes                | Yes                | No          | Yes                   | Yes                    | No                | Yes                    | Yes                 | 6           |
| (MARSHALL; MURPHY, 2006)         | Yes                   | Yes                | Yes                | No          | Yes                   | Yes                    | No                | Yes                    | Yes                 | 7           |
| (HYONG; KANG, 2013)              | No                    | Yes                | Yes                | No          | No                    | Yes                    | No                | Yes                    | Yes                 | 5           |
| (JEON et al., 2020)              | No                    | Yes                | Yes                | No          | No                    | No                     | No                | No                     | Yes                 | 3           |
| (KANG et al., 2017)              | No                    | Yes                | Yes                | No          | No                    | Yes                    | No                | Yes                    | No                  | 4           |
| (MCBRIDE; CORMIE; DEANE, 2006)   | No                    | Yes                | Yes                | No          | No                    | Yes                    | No                | Yes                    | Yes                 | 5           |
| (BUSCÀ et al., 2020)             | Yes                   | Yes                | Yes                | No          | No                    | No                     | No                | Yes                    | Yes                 | 5           |
| (KIM et al., 2021)               | No                    | Yes                | Yes                | No          | Yes                   | Yes                    | No                | Yes                    | Yes                 | 6           |
| (GÜNDOĞAN; AYDIN; SAĞLAM, 2023)  | No                    | Yes                | Yes                | No          | Yes                   | Yes                    | No                | Yes                    | Yes                 | 6           |
| (MAIOR et al., 2009)             | No                    | Yes                | Yes                | No          | No                    | Yes                    | No                | Yes                    | No                  | 4           |

**Table 3.** Evaluation of the quality of the selected studies with evaluations of internal validity and external validity of upper limbs muscles.

| Author/year                         | External Validity     |                    | Internal Validity  |             |                       |                        |                   |                        |                     |             |
|-------------------------------------|-----------------------|--------------------|--------------------|-------------|-----------------------|------------------------|-------------------|------------------------|---------------------|-------------|
|                                     | Representative sample | Participation rate | Performance        | Detection   | Selection Bias        |                        |                   |                        |                     |             |
|                                     |                       |                    | Direct observation | Blind rater | Appropriate electrode | Adequate normalization | MVC randomization | Exercise randomization | Adequate statistics | Total score |
| (SOUSA et al., 2022)                | Yes                   | Yes                | Yes                | No          | Yes                   | Yes                    | Yes               | Yes                    | Yes                 | 8           |
| (PALMA et al., 2021)                | No                    | No                 | Yes                | No          | Yes                   | Yes                    | No                | No                     | Yes                 | 4           |
| (SANDHU; MAHAJAN; SHENOY, 2008)     | No                    | No                 | Yes                | No          | Yes                   | Yes                    | No                | Yes                    | Yes                 | 5           |
| (BORREANI et al., 2015b)            | Yes                   | Yes                | Yes                | No          | Yes                   | Yes                    | No                | Yes                    | Yes                 | 7           |
| (CALATAYUD et al., 2014b)           | Yes                   | Yes                | Yes                | No          | Yes                   | Yes                    | No                | Yes                    | Yes                 | 7           |
| (BORREANI et al., 2015a)            | Yes                   | Yes                | Yes                | No          | Yes                   | Yes                    | No                | Yes                    | Yes                 | 7           |
| (SNARR; ESCO, 2013)                 | No                    | Yes                | Yes                | No          | Yes                   | Yes                    | No                | Yes                    | Yes                 | 6           |
| (HERRINGTON; WATERMAN; SMITH, 2015) | No                    | Yes                | Yes                | No          | Yes                   | Yes                    | No                | No                     | Yes                 | 5           |
| (PONTILLO et al., 2007)             | No                    | Yes                | Yes                | No          | Yes                   | Yes                    | No                | Yes                    | Yes                 | 6           |
| (DE ARAÚJO et al., 2011)            | No                    | Yes                | Yes                | No          | Yes                   | Yes                    | No                | Yes                    | Yes                 | 6           |
| (KIM et al., 2012)                  | No                    | Yes                | Yes                | No          | No                    | No                     | No                | No                     | Yes                 | 3           |
| (PARK; YOO, 2013)                   | No                    | Yes                | Yes                | No          | Yes                   | Yes                    | No                | Yes                    | No                  | 5           |
| (ANDERSON et al., 2013)             | No                    | Yes                | Yes                | No          | Yes                   | No                     | No                | No                     | Yes                 | 4           |
| (PATTERSON et al., 2015)            | No                    | No                 | Yes                | No          | Yes                   | No                     | No                | Yes                    | Yes                 | 4           |
| (ANDERSON; BEHM, 2004)              | No                    | Yes                | Yes                | No          | Yes                   | No                     | No                | Yes                    | Yes                 | 5           |
| (MARSHALL; MURPHY, 2006b)           | Yes                   | Yes                | Yes                | No          | Yes                   | No                     | No                | Yes                    | Yes                 | 6           |
| (SAETERBAKKEN; FIMLAND, 2013)       | Yes                   | No                 | Yes                | No          | Yes                   | No                     | No                | Yes                    | Yes                 | 5           |
| (NAIRN; SUTHERLAND; DRAKE, 2015)    | No                    | Yes                | Yes                | No          | Yes                   | Yes                    | No                | Yes                    | Yes                 | 6           |
| (ARANDA et al., 2016)               | No                    | Yes                | Yes                | No          | Yes                   | Yes                    | No                | Yes                    | Yes                 | 6           |
| (REISER et al., 2017)               | Yes                   | No                 | Yes                | No          | Yes                   | Yes                    | No                | Yes                    | Yes                 | 6           |
| (MELO et al., 2014)                 | No                    | Yes                | Yes                | No          | Yes                   | Yes                    | Yes               | Yes                    | Yes                 | 7           |
| (NASCIMENTO et al., 2017)           | No                    | Yes                | Yes                | No          | Yes                   | Yes                    | No                | Yes                    | No                  | 5           |
| (KOHLER; FLANAGAN; WHITING, 2010)   | Yes                   | Yes                | Yes                | No          | Yes                   | No                     | No                | Yes                    | Yes                 | 6           |
| (MARSHALL; MURPHY, 2006)            | Yes                   | Yes                | Yes                | No          | Yes                   | Yes                    | No                | Yes                    | Yes                 | 7           |
| (JEONG; CHUNG; SHIM, 2014)          | No                    | Yes                | Yes                | No          | Yes                   | Yes                    | No                | No                     | Yes                 | 5           |
| (LEHMAN et al., 2006)               | No                    | Yes                | Yes                | No          | Yes                   | Yes                    | No                | Yes                    | Yes                 | 6           |
| (TORRES et al., 2017)               | No                    | Yes                | Yes                | No          | Yes                   | Yes                    | No                | Yes                    | Yes                 | 6           |

**Table 3. (continued)**

|                                         |     |     |     |    |     |     |    |     |     |   |
|-----------------------------------------|-----|-----|-----|----|-----|-----|----|-----|-----|---|
| (SYED-ABDUL et al., 2018)               | Yes | Yes | Yes | No | Yes | No  | No | Yes | Yes | 6 |
| (HWANGBO; KIM, 2012)                    | No  | Yes | Yes | No | No  | Yes | No | Yes | Yes | 5 |
| (PARK et al., 2013)                     | No  | Yes | Yes | No | Yes | Yes | No | Yes | Yes | 6 |
| (CALATAYUD et al., 2014a)               | No  | Yes | Yes | No | Yes | Yes | No | Yes | Yes | 6 |
| (BEZERRA et al., 2020)                  | No  | Yes | Yes | No | Yes | Yes | No | Yes | Yes | 6 |
| (DE OLIVEIRA; DE MORAIS; DE BRUM, 2008) | No  | Yes | Yes | No | Yes | Yes | No | Yes | Yes | 6 |
| (URIBE et al., 2010)                    | No  | Yes | Yes | No | Yes | Yes | No | Yes | Yes | 6 |
| (YOUODAS et al., 2020)                  | No  | Yes | Yes | No | Yes | Yes | No | Yes | Yes | 6 |
| (DE MEY et al., 2014)                   | No  | Yes | Yes | No | No  | Yes | No | Yes | Yes | 5 |

**Table 4.** Evaluation of the quality of the selected studies with evaluations of internal validity and external validity of all muscles.

| Author/year                          | External Validity     |                    | Internal Validity  |             |                       |                        |                   |                        |                     |             |
|--------------------------------------|-----------------------|--------------------|--------------------|-------------|-----------------------|------------------------|-------------------|------------------------|---------------------|-------------|
|                                      | Representative sample | Participation rate | Performance        | Detection   | Selection Bias        |                        |                   |                        |                     |             |
|                                      |                       |                    | Direct observation | Blind rater | Appropriate electrode | Adequate normalization | MVC randomization | Exercise randomization | Adequate statistics | Total score |
| (BEHM et al., 2005)                  | No                    | Yes                | Yes                | No          | Yes                   | Yes                    | No                | Yes                    | Yes                 | 6           |
| (IMAI et al., 2010)                  | No                    | Yes                | Yes                | No          | Yes                   | Yes                    | No                | No                     | Yes                 | 5           |
| (KIM; KIM; CHUNG, 2014)              | No                    | Yes                | Yes                | No          | Yes                   | Yes                    | No                | No                     | Yes                 | 5           |
| (HA et al., 2015)                    | No                    | Yes                | Yes                | No          | Yes                   | Yes                    | No                | Yes                    | Yes                 | 6           |
| (KIM et al., 2018)                   | No                    | Yes                | Yes                | No          | Yes                   | Yes                    | No                | Yes                    | Yes                 | 6           |
| (SUNDSTRUP et al., 2012)             | No                    | Yes                | Yes                | No          | Yes                   | Yes                    | No                | Yes                    | Yes                 | 6           |
| (LEHMAN et al., 2005)                | No                    | Yes                | Yes                | No          | Yes                   | Yes                    | No                | No                     | Yes                 | 5           |
| (YOUDAS et al., 2015)                | Yes                   | Yes                | Yes                | No          | Yes                   | Yes                    | No                | Yes                    | Yes                 | 7           |
| (YOUDAS et al., 2017)                | Yes                   | Yes                | Yes                | No          | Yes                   | Yes                    | No                | Yes                    | Yes                 | 7           |
| (VILAÇA-ALVES et al., 2016)          | No                    | Yes                | Yes                | No          | Yes                   | No                     | No                | Yes                    | Yes                 | 5           |
| (SNARR; ESCO, 2014)                  | No                    | Yes                | Yes                | No          | Yes                   | Yes                    | No                | Yes                    | Yes                 | 6           |
| (ATKINS et al., 2015)                | No                    | Yes                | Yes                | No          | Yes                   | Yes                    | No                | Yes                    | Yes                 | 6           |
| (STERNLICHT et al., 2007)            | No                    | Yes                | Yes                | No          | Yes                   | No                     | No                | Yes                    | Yes                 | 5           |
| (FELDWIESER et al., 2012)            | No                    | Yes                | Yes                | No          | Yes                   | Yes                    | No                | Yes                    | Yes                 | 6           |
| (KIM; OH, 2015)                      | No                    | Yes                | Yes                | No          | Yes                   | Yes                    | No                | Yes                    | Yes                 | 6           |
| (LEE; PARK; LEE, 2015)               | No                    | Yes                | Yes                | No          | No                    | Yes                    | No                | Yes                    | Yes                 | 5           |
| (SAETERBAKKEN et al., 2014)          | No                    | Yes                | Yes                | No          | Yes                   | No                     | No                | Yes                    | Yes                 | 5           |
| (BYRNE et al., 2014)                 | No                    | No                 | Yes                | No          | Yes                   | Yes                    | No                | Yes                    | Yes                 | 5           |
| (YOON et al., 2018)                  | No                    | Yes                | Yes                | No          | Yes                   | Yes                    | No                | Yes                    | Yes                 | 6           |
| (KIM et al., 2011)                   | No                    | Yes                | Yes                | No          | Yes                   | Yes                    | No                | Yes                    | Yes                 | 6           |
| (MARSHALL; MURPHY, 2006)             | Yes                   | Yes                | Yes                | No          | Yes                   | Yes                    | No                | Yes                    | Yes                 | 7           |
| (ANDRADE et al., 2015)               | No                    | Yes                | Yes                | No          | Yes                   | Yes                    | No                | No                     | Yes                 | 5           |
| (BISCARINI; CONTEMORI; GROLLA, 2019) | No                    | Yes                | Yes                | No          | No                    | Yes                    | No                | Yes                    | Yes                 | 5           |
| (CZAPROWSKI et al., 2014)            | No                    | Yes                | Yes                | No          | Yes                   | Yes                    | No                | Yes                    | Yes                 | 6           |
| (LEE et al., 2017)                   | No                    | No                 | Yes                | No          | Yes                   | Yes                    | No                | No                     | No                  | 3           |

Table 4. (continued)

|                                  |     |     |     |    |     |     |     |     |     |   |
|----------------------------------|-----|-----|-----|----|-----|-----|-----|-----|-----|---|
| (LUK et al., 2021)               | No  | Yes | Yes | No | Yes | Yes | No  | No  | Yes | 5 |
| (ANDERSON; BEHM, 2005)           | No  | Yes | Yes | No | Yes | No  | No  | Yes | Yes | 5 |
| (LEE; CHOI; KIM, 2017)           | No  | Yes | Yes | No | No  | Yes | No  | No  | Yes | 4 |
| (HAN et al., 2017)               | No  | Yes | Yes | No | No  | No  | No  | No  | Yes | 3 |
| (LI; CAO; CHEN, 2013)            | No  | Yes | Yes | No | Yes | No  | No  | Yes | Yes | 5 |
| (WAHL; BEHM, 2008)               | No  | Yes | Yes | No | Yes | No  | No  | Yes | Yes | 5 |
| (SAETERBAKKEN; FIMLAND, 2013)    | No  | Yes | Yes | No | Yes | No  | No  | Yes | Yes | 5 |
| (BEHM; ANDERSON; CURNEW, 2002)   | Yes | Yes | Yes | No | Yes | No  | No  | No  | Yes | 5 |
| (AGUILERA-CASTELLS et al., 2019) | Yes | Yes | Yes | No | Yes | Yes | No  | Yes | Yes | 7 |
| (ANDERSEN et al., 2014)          | No  | Yes | Yes | No | Yes | Yes | No  | Yes | Yes | 6 |
| (NAIRN; SUTHERLAND; DRAKE, 2017) | No  | Yes | Yes | No | Yes | Yes | No  | Yes | Yes | 6 |
| (KRAUSE et al., 2018b)           | Yes | Yes | Yes | No | Yes | Yes | No  | Yes | Yes | 7 |
| (ARANDA et al., 2016)            | No  | Yes | Yes | No | Yes | Yes | No  | Yes | Yes | 6 |
| (MARÍN; HAZELL, 2014)            | No  | Yes | Yes | No | Yes | Yes | No  | Yes | Yes | 6 |
| (PARK et al., 2015)              | No  | Yes | Yes | No | No  | No  | No  | No  | Yes | 3 |
| (MCBRIDE et al., 2010)           | No  | Yes | Yes | No | Yes | No  | No  | Yes | Yes | 5 |
| (KIM et al., 2013)               | No  | Yes | Yes | No | Yes | Yes | No  | Yes | Yes | 6 |
| (MILLER et al., 2019)            | Yes | Yes | Yes | No | Yes | Yes | No  | Yes | Yes | 7 |
| (BOUILLON et al., 2019)          | No  | Yes | Yes | No | Yes | Yes | No  | Yes | Yes | 6 |
| (HYONG; KANG, 2013)              | No  | Yes | Yes | No | No  | Yes | No  | Yes | Yes | 5 |
| (JEON et al., 2020)              | No  | Yes | Yes | No | No  | No  | No  | No  | Yes | 3 |
| (KANG et al., 2017)              | No  | Yes | Yes | No | No  | Yes | No  | Yes | No  | 4 |
| (MCBRIDE; CORMIE; DEANE, 2006)   | No  | Yes | Yes | No | No  | Yes | No  | Yes | Yes | 5 |
| (BUSCÀ et al., 2020)             | Yes | Yes | Yes | No | No  | No  | No  | Yes | Yes | 5 |
| (KIM et al., 2021)               | No  | Yes | Yes | No | Yes | Yes | No  | Yes | Yes | 6 |
| (SOUSA et al., 2022)             | Yes | Yes | Yes | No | Yes | Yes | Yes | Yes | Yes | 8 |
| (PALMA et al., 2021)             | No  | No  | Yes | No | Yes | Yes | No  | No  | Yes | 4 |
| (SANDHU; MAHAJAN; SHENOY, 2008)  | No  | No  | Yes | No | Yes | Yes | No  | Yes | Yes | 5 |

**Table 4. (continued)**

|                                         |     |     |     |    |     |     |     |     |     |   |
|-----------------------------------------|-----|-----|-----|----|-----|-----|-----|-----|-----|---|
| (BORREANI et al., 2015b)                | Yes | Yes | Yes | No | Yes | Yes | No  | Yes | Yes | 7 |
| (CALATAYUD et al., 2014b)               | Yes | Yes | Yes | No | Yes | Yes | No  | Yes | Yes | 7 |
| (BORREANI et al., 2015a)                | Yes | Yes | Yes | No | Yes | Yes | No  | Yes | Yes | 7 |
| (SNARR; ESCO, 2013)                     | No  | Yes | Yes | No | Yes | Yes | No  | Yes | Yes | 6 |
| (HERRINGTON; WATERMAN; SMITH, 2015)     | No  | Yes | Yes | No | Yes | Yes | No  | No  | Yes | 5 |
| (PONTILLO et al., 2007)                 | No  | Yes | Yes | No | Yes | Yes | No  | Yes | Yes | 6 |
| (DE ARAÚJO et al., 2011)                | No  | Yes | Yes | No | Yes | Yes | No  | Yes | Yes | 6 |
| (KIM et al., 2012)                      | No  | Yes | Yes | No | No  | No  | No  | No  | Yes | 3 |
| (PARK; YOO, 2013)                       | No  | Yes | Yes | No | Yes | Yes | No  | Yes | No  | 5 |
| (ANDERSON et al., 2013)                 | No  | Yes | Yes | No | Yes | No  | No  | No  | Yes | 4 |
| (PATTERSON et al., 2015)                | No  | No  | Yes | No | Yes | No  | No  | Yes | Yes | 4 |
| (ANDERSON; BEHM, 2004)                  | No  | Yes | Yes | No | Yes | No  | No  | Yes | Yes | 5 |
| (MARSHALL; MURPHY, 2006b)               | Yes | Yes | Yes | No | Yes | No  | No  | Yes | Yes | 6 |
| (SAETERBAKKEN; FIMLAND, 2013)           | Yes | No  | Yes | No | Yes | No  | No  | Yes | Yes | 5 |
| (NAIRN; SUTHERLAND; DRAKE, 2015)        | No  | Yes | Yes | No | Yes | Yes | No  | Yes | Yes | 6 |
| (REISER et al., 2017)                   | Yes | No  | Yes | No | Yes | Yes | No  | Yes | Yes | 6 |
| (MELO et al., 2014)                     | No  | Yes | Yes | No | Yes | Yes | Yes | Yes | Yes | 7 |
| (NASCIMENTO et al., 2017)               | No  | Yes | Yes | No | Yes | Yes | No  | Yes | No  | 5 |
| (KOHLER; FLANAGAN; WHITING, 2010)       | Yes | Yes | Yes | No | Yes | No  | No  | Yes | Yes | 6 |
| (JEONG; CHUNG; SHIM, 2014)              | No  | Yes | Yes | No | Yes | Yes | No  | No  | Yes | 5 |
| (LEHMAN et al., 2006)                   | No  | Yes | Yes | No | Yes | Yes | No  | Yes | Yes | 6 |
| (TORRES et al., 2017)                   | No  | Yes | Yes | No | Yes | Yes | No  | Yes | Yes | 6 |
| (SYED-ABDUL et al., 2018)               | Yes | Yes | Yes | No | Yes | No  | No  | Yes | Yes | 6 |
| (HWANGBO; KIM, 2012)                    | No  | Yes | Yes | No | No  | Yes | No  | Yes | Yes | 5 |
| (PARK et al., 2013)                     | No  | Yes | Yes | No | Yes | Yes | No  | Yes | Yes | 6 |
| (CALATAYUD et al., 2014a)               | No  | Yes | Yes | No | Yes | Yes | No  | Yes | Yes | 6 |
| (BEZERRA et al., 2020)                  | No  | Yes | Yes | No | Yes | Yes | No  | Yes | Yes | 6 |
| (DE OLIVEIRA; DE MORAIS; DE BRUM, 2008) | No  | Yes | Yes | No | Yes | Yes | No  | Yes | Yes | 6 |



Table 4. (continued)

|                                 |    |     |     |    |     |     |    |     |     |   |
|---------------------------------|----|-----|-----|----|-----|-----|----|-----|-----|---|
| (URIBE et al., 2010)            | No | Yes | Yes | No | Yes | Yes | No | Yes | Yes | 6 |
| (YOUODAS et al., 2020)          | No | Yes | Yes | No | Yes | Yes | No | Yes | Yes | 6 |
| (DE MEY et al., 2014)           | No | Yes | Yes | No | No  | Yes | No | Yes | Yes | 5 |
| (GÜNDOĞAN; AYDIN; SAĞLAM, 2023) | No | Yes | Yes | No | Yes | Yes | No | Yes | Yes | 6 |
| (MAIOR et al., 2009)            | No | Yes | Yes | No | No  | Yes | No | Yes | No  | 4 |
