# Supplementary material for: Comparison of the Electromyography Activity during Exercises with Stable and Unstable Surfaces: A Systematic Review and Meta-Analysis
Source: Sports (Basel). 2024 Apr 18;12(4):111. doi: 10.3390/sports12040111 (PMC11055131; doi:10.3390/sports12040111)
Supplement: Supplementary file 1 [file sports-12-00111-s001.zip]

Archive with 5 entries (5 files):
- Supplementary Online Material S1.pdf
- Supplementary Online Material S2.pdf
- Supplementary Online Material S3.pdf
- Supplementary Online Material S4.pdf
- Supplementary Online Material S5.pdf
